# Supplementary material for: Integrated genomic analysis of mitochondrial RNA processing in human cancers
Source: Genome Med. 2017 Apr 18;9:36. doi: 10.1186/s13073-017-0426-0 (PMC5395977; doi:10.1186/s13073-017-0426-0)
Supplement: Supplementary file 2 — Comparisons between methylation levels at each p9 site with mitochondrial gene expression. Analyses were performed within either normal or tumor samples, and across all cancers. (XLSX 148 kb) [file 13073_2017_426_MOESM2_ESM.xlsx]

## Sheet: Sheet1
Table S7: Comparisons between methylation levels at each p9 site with mitochondrial gene expression. Analyses are performed within either normal or tumor samples, and across all cancers.
P Values																	R Values
BRCA	normal																BRCA	normal
	MTCYB	MTND3	MTND5	MTCO3	MTATP6	MTRNR1	MTRNR2	MTCO1	MTATP8	MTND2	MTND1	MTCO2	MTND4L	MTND4	MTND6			MTCYB	MTND3	MTND5	MTCO3	MTATP6	MTRNR1	MTRNR2	MTCO1	MTATP8	MTND2	MTND1	MTCO2	MTND4L	MTND4	MTND6
585	0.928246	0.37046	0.328774	0.0193795	0.520966	0.957342	0.838976	0.00066885	0.610331	0.184542	0.22251	0.0213586	0.939696	0.858351	0.826856		585	-0.00872584	0.0866214	-0.0944193	-0.223687	0.0621357	-0.00518313	0.0196884	-0.320894	0.0493501	0.128046	-0.117794	-0.220276	0.00733062	0.0172927	-0.021193
1610	0.605837	0.895198	0.221098	0.00221434	0.300263	0.339244	0.334138	0.00164288	0.0644294	0.00140393	0.859297	0.110144	0.340961	0.874753	0.735189		1610	0.0509359	0.0130107	-0.120419	-0.295453	0.102048	-0.0941828	-0.0951788	-0.30358	-0.181136	0.307769	-0.0175079	-0.156815	-0.0938499	-0.015568	-0.0333985
4271	0.757272	0.0459898	0.331746	3.31384e-05	0.387004	0.961629	0.7348	0.00782031	0.592018	0.0470655	0.0659779	0.000352476	0.843714	0.411394	0.504836		4271	0.0302267	-0.193357	0.0947333	-0.389851	0.0844714	-0.00470617	0.0331281	-0.255837	0.0523885	0.192428	0.178408	-0.339134	-0.0192834	0.0802262	0.0651686
5520	0.106093	0.802338	0.539347	0.0552222	0.237393	0.699566	0.282009	0.0266525	0.8427	0.000382771	0.786377	0.367786	0.37358	0.151088	0.888891		5520	0.169576	0.026455	-0.064812	-0.20058	0.124405	-0.0407742	-0.11335	-0.231115	0.0209734	0.362563	-0.0286413	-0.0949832	0.0938448	0.150887	-0.0147666
7526	0.582068	0.0361031	0.0330987	0.744082	0.0817645	0.481504	0.216642	0.994062	0.637064	0.252714	0.0758152	0.56631	0.804881	0.372443	0.00459845		7526	-0.0574882	-0.216488	-0.220027	-0.0341176	0.18046	0.0734853	0.128624	-0.000778073	-0.0492932	0.119145	-0.184024	0.0598998	0.0258209	0.0930382	-0.289869
8303	0.0122892	0.631539	0.34573	1.24478e-10	0.832989	4.78674e-05	0.00165506	6.03622e-06	0.362177	6.78271e-06	0.273336	0.000267393	0.628869	0.2589	0.0726626		8303	0.243563	-0.0473408	-0.0929311	-0.576368	0.0208258	-0.385917	-0.303382	-0.425521	-0.0898217	0.423419	0.10788	-0.348659	0.0477114	0.111168	-0.175906
9999	0.450415	0.163476	0.699288	3.67829e-09	0.890152	0.0581244	0.0455759	3.02827e-06	0.641363	1.90224e-06	0.563884	0.000799882	0.749569	0.91558	0.87279		9999	0.0730347	-0.134414	-0.0374175	-0.527847	0.0133824	-0.182064	-0.191927	-0.430207	-0.0451123	0.43804	0.0558753	-0.316495	-0.0309238	-0.0102714	0.0155142
10413	0.0172869	0.77358	0.952032	6.07571e-08	0.963094	0.0486113	0.00846961	5.32364e-06	0.447674	9.26529e-05	0.58622	0.000124186	0.935003	0.713857	0.701873		10413	0.227637	-0.0278722	-0.00582891	-0.490684	0.0044836	-0.189353	-0.251015	-0.420431	-0.0734763	0.365589	0.052708	-0.359371	-0.00790225	0.0355201	-0.0370798
12146	0.148288	0.382735	0.0820209	0.019901	0.529721	0.373243	0.183093	0.000133397	0.75829	0.00351997	0.593029	0.109252	0.439642	0.620596	0.673831		12146	0.139394	0.0844295	-0.167326	-0.222761	0.0608384	-0.0861207	-0.128467	-0.357832	-0.0298121	0.277214	-0.0517535	-0.154261	-0.074779	0.0479383	-0.0407678
12274	0.0171243	0.122885	0.0932132	9.40812e-06	0.685754	0.0583075	0.025737	0.0361518	0.91702	3.04671e-07	0.496213	0.0450652	0.0323546	0.0673971	0.465899		12274	0.227961	-0.148663	0.161593	-0.410245	0.0391929	-0.181934	-0.213601	-0.20095	0.0100956	0.46713	0.0658648	-0.192374	0.205155	0.175848	0.070568
14734	0.250618	0.599541	0.685732	0.231913	0.96173	0.907724	0.975534	0.533303	0.899502	0.127616	0.952002	0.0948926	0.513115	0.654568	0.348253		14734	0.110979	-0.0508454	0.0391958	-0.11545	0.00464955	-0.0112312	0.00297178	-0.0603108	0.0122371	0.146832	0.00583268	-0.160781	-0.0633084	-0.0433351	0.0907028
BRCA	tumour																BRCA	tumour
	MTCYB	MTND3	MTND5	MTCO3	MTATP6	MTRNR1	MTRNR2	MTCO1	MTATP8	MTND2	MTND1	MTCO2	MTND4L	MTND4	MTND6			MTCYB	MTND3	MTND5	MTCO3	MTATP6	MTRNR1	MTRNR2	MTCO1	MTATP8	MTND2	MTND1	MTCO2	MTND4L	MTND4	MTND6
585	0.489876	0.871747	0.435778	0.488013	0.707187	0.420309	0.568349	0.366754	0.628808	0.0217583	0.910345	0.463884	0.0213026	0.166221	0.380943		585	-0.0671504	-0.0157165	0.075766	-0.0674382	0.036559	0.0783386	0.0554983	0.0877028	0.0470373	0.220633	0.0109625	0.0712207	0.221385	0.134177	0.085146
1610	0.0972311	0.795014	0.165343	0.426431	0.573831	0.617616	0.37867	0.301871	0.548253	0.127823	0.970563	0.503216	0.330115	0.846829	0.506256		1610	-0.173011	0.0273048	-0.145059	0.0834549	0.0590679	0.0524416	0.0923416	-0.108207	-0.0630472	0.159045	0.00387904	0.0702822	-0.102104	0.0203029	-0.0697837
4271	0.310462	0.220687	0.204474	0.320154	0.686355	0.397487	0.836358	0.160183	0.0785885	0.0311173	0.402518	0.384356	0.616622	0.515019	0.182467		4271	-0.106901	-0.128913	0.133525	0.104793	0.0426639	0.0892581	0.0218307	0.14764	0.184327	0.224921	0.088314	0.0917561	0.0528822	0.0687354	0.140225
5520	0.898721	0.328117	0.611014	0.537762	0.372726	0.0179799	0.250101	0.478271	0.620648	0.780741	0.161493	0.953474	0.770707	0.835535	0.200796		5520	-0.016362	0.125227	0.0653204	-0.0790962	0.114222	0.297272	0.147055	-0.0909726	0.0635654	-0.0357744	-0.178546	-0.00750091	0.0374565	0.0266859	0.163361
7526	0.911681	0.557671	0.447513	0.718419	0.668849	0.0247459	0.0191617	0.0947246	0.228322	0.104708	0.282694	0.75722	0.173827	0.0825079	0.478788		7526	0.0145009	-0.0765419	0.0990624	0.0471157	0.0558782	0.287339	0.299194	0.215883	0.15653	-0.209754	-0.139763	0.0404001	0.176412	0.224111	0.0923999
8303	0.00458051	0.403318	0.276657	0.604803	0.835823	0.312796	0.96682	0.905768	0.906122	0.366343	0.245211	0.819648	0.359085	0.399579	0.808749		8303	-0.285548	-0.0858093	-0.111557	0.0531972	-0.0213159	-0.103553	-0.004279	0.0121769	0.0121309	0.0927251	0.119113	-0.0234505	-0.0941318	-0.0864908	-0.0248944
9999	0.0596917	0.95713	0.774235	0.178228	0.785372	0.223179	0.211043	0.555757	0.99013	0.616731	0.997417	0.817314	0.311107	0.430359	0.524565		9999	-0.182653	0.00525847	0.0280539	-0.131123	-0.0266349	0.118737	0.12189	-0.0575849	0.00121011	0.0489298	0.000316684	-0.0225942	0.0988419	0.077026	0.0621867
10413	0.00968971	0.280129	0.439701	0.0650381	0.373061	0.97517	0.288983	0.990682	0.674383	0.286758	0.00368399	0.305574	0.978528	0.399345	0.133824		10413	-0.247893	-0.104859	0.075122	-0.178185	-0.086559	-0.00303025	0.102959	-0.00113695	-0.0408868	0.103433	0.277168	-0.0995006	-0.00262036	0.0819144	0.145184
12146	0.25546	0.293483	0.283081	0.132311	0.1714	0.318526	0.0456603	0.293978	0.283929	0.536695	0.525632	0.624245	0.968047	0.233675	0.100948		12146	-0.110376	-0.102009	0.104221	-0.145745	-0.13257	0.0968849	0.192743	0.101905	-0.104039	0.0600951	0.0617329	-0.047663	0.00389991	0.115559	0.15868
12274	0.285467	0.551282	0.145002	0.0697848	0.170783	0.567219	0.451623	0.97099	0.3071	0.0155809	0.45247	0.118837	0.0433853	0.0770261	0.0847902		12274	-0.103224	-0.0576887	-0.140521	0.17436	0.13214	-0.0553987	0.0728406	-0.00352389	0.0987242	0.231177	0.0727047	0.150272	0.193875	0.170088	-0.165852
14734	0.78784	0.0528576	0.816346	0.327921	0.261338	0.266234	0.308529	0.884175	0.152063	0.364631	0.741349	0.386608	0.0146769	0.363333	0.39052		14734	0.0260728	-0.185966	-0.0225019	0.0945852	0.108519	-0.107419	0.0984345	0.0141155	0.138122	0.0876777	-0.0319753	0.0837468	0.23319	0.0879144	-0.0830616
COAD	normal																COAD	normal
	MTCYB	MTND3	MTND5	MTCO3	MTATP6	MTRNR1	MTRNR2	MTCO1	MTATP8	MTND2	MTND1	MTCO2	MTND4L	MTND4	MTND6			MTCYB	MTND3	MTND5	MTCO3	MTATP6	MTRNR1	MTRNR2	MTCO1	MTATP8	MTND2	MTND1	MTCO2	MTND4L	MTND4	MTND6
585	0.484922	0.351303	0.869022	0.383269	0.0732442	0.583922	0.565951	0.399871	0.247548	0.351303	0.326101	0.967856	0.217507	0.0213436	0.443094		585	-0.146422	0.194584	-0.0347493	-0.182241	0.364482	-0.115059	-0.120557	0.176063	0.240156	0.194584	-0.204792	-0.00849427	0.2556	0.457919	0.160619
1610	0.282189	0.352129	0.366864	0.0844251	0.981072	0.250907	0.0662528	0.144492	0.366864	0.336747	0.440007	0.329227	0.870936	0.18779	0.940351		1610	-0.223798	0.194257	-0.188498	-0.351991	-0.00500096	-0.238507	-0.373051	-0.300442	-0.188498	0.200424	-0.161694	-0.203501	0.0342373	0.27236	0.0157723
4271	0.77433	0.131448	0.427899	0.565788	0.353857	0.601436	0.816928	0.780958	0.0554329	0.404116	0.80422	0.788156	0.968342	0.690899	0.353857		4271	0.0632519	0.32404	-0.173734	-0.126305	-0.202604	0.114963	0.0510881	0.0613482	-0.404692	-0.182679	0.0547004	-0.0592861	-0.00876403	-0.0876403	-0.202604
5520	0.740772	0.922023	0.540939	0.36675	0.965406	0.504863	0.303469	0.190459	0.272407	0.939451	0.365292	0.224599	0.44291	0.267368	0.887869		5520	-0.0898268	0.0266272	-0.165192	-0.241889	0.0117995	-0.179942	-0.274539	-0.345134	-0.292037	0.0206643	0.242604	-0.321535	-0.206491	0.294986	0.0383483
7526	0.897994	0.606279	0.745235	0.924225	0.390426	0.915339	0.783711	0.238022	0.416334	0.993303	0.25919	0.728284	0.814105	0.141981	0.73251		7526	0.0297929	-0.119374	-0.0754227	0.0221066	-0.197659	-0.0247074	0.0637399	0.269181	-0.187256	0.00195122	0.257812	-0.0806243	0.0546164	0.3316	0.0793239
8303	0.436703	0.556071	0.794774	0.177412	0.779681	0.160585	0.964291	0.73065	0.820811	0.0419493	0.910871	0.108403	0.251684	0.57848	0.346322		8303	-0.179322	0.136201	0.0604092	-0.305943	0.0649562	0.317636	0.0104065	0.0798961	-0.0526145	-0.44748	0.0260163	-0.360507	-0.261773	-0.128613	0.216304
9999	0.255093	0.00907279	0.847234	0.0408726	0.36615	0.26165	0.933486	0.777984	0.164771	0.667308	0.656793	0.00572401	0.523049	0.179374	0.727603		9999	-0.259965	0.554614	0.0447593	-0.449597	-0.207763	0.256531	-0.0193986	-0.0654688	-0.314651	-0.0996688	-0.103013	-0.581202	-0.147639	-0.30463	0.0808339
10413	0.598708	0.0619246	0.64954	0.661762	0.115724	0.9109	0.901903	0.919781	0.0461894	0.8401	0.986592	0.443146	0.866669	0.879904	0.517637		10413	-0.121872	0.414221	0.105332	-0.101431	-0.353706	0.0260078	0.0286458	0.023407	-0.439532	0.046875	0.00390625	-0.176853	-0.0390117	-0.0351106	0.149545
12146	0.128242	0.0342998	0.907344	0.0288903	0.59771	0.847315	0.561692	0.738455	0.113541	0.833134	0.826136	0.116365	0.694786	0.791551	0.926886		12146	-0.326608	0.442904	0.0256981	-0.455646	-0.116135	-0.0425006	-0.127628	-0.0736348	-0.339017	0.0465001	-0.0484789	-0.336546	0.0864838	-0.0583148	-0.0202619
12274	0.203209	0.113628	0.46162	0.110656	0.665438	0.764004	0.627022	0.491491	0.357756	0.816631	0.983193	0.478098	0.829114	0.631133	0.743949		12274	-0.27552	0.33894	-0.161499	-0.341587	-0.0952726	-0.0662261	-0.106997	-0.151042	-0.201002	0.0511725	-0.00465204	-0.155689	0.0476363	0.105729	-0.0720354
14734	0.600994	0.71508	0.0218785	0.233139	0.192223	0.347373	0.356737	0.0387123	0.797853	0.918292	0.575505	0.128752	0.320029	0.905396	0.0270993		14734	0.109903	0.076834	-0.456263	0.247399	-0.26975	-0.196147	-0.192441	-0.4158	0.05395	0.0216216	-0.117625	0.312139	0.207322	0.0250482	-0.441619
COAD	tumour																COAD	tumour
	MTCYB	MTND3	MTND5	MTCO3	MTATP6	MTRNR1	MTRNR2	MTCO1	MTATP8	MTND2	MTND1	MTCO2	MTND4L	MTND4	MTND6			MTCYB	MTND3	MTND5	MTCO3	MTATP6	MTRNR1	MTRNR2	MTCO1	MTATP8	MTND2	MTND1	MTCO2	MTND4L	MTND4	MTND6
585	0.126227	0.811688	0.344996	0.334654	0.979294	0.856782	0.378033	0.309619	0.605712	0.277573	0.021893	0.333374	0.339802	0.320739	0.523294		585	0.328245	-0.052576	-0.206283	0.210649	-0.0057315	0.0398377	0.19283	-0.221563	-0.113623	-0.236356	-0.475324	0.211195	-0.208466	-0.216652	-0.140251
1610	0.628657	0.791201	0.328823	0.0576395	0.566118	0.544096	0.172916	0.762682	0.206797	0.725369	0.386449	0.121221	0.655919	0.844846	0.160133		1610	-0.122343	-0.0671532	-0.244181	0.455252	-0.144928	0.15313	0.335925	0.0765652	-0.312469	-0.0890271	-0.21728	0.378687	0.112778	-0.0496639	-0.345578
4271	0.982276	0.435077	0.373555	0.696842	0.717637	0.730205	0.626685	0.793958	0.352099	0.265363	0.0347144	0.0910538	0.751294	0.226775	0.191644		4271	0.00604429	0.209976	-0.238574	-0.105697	-0.0981475	-0.0936176	0.131755	-0.0709682	-0.249143	-0.29617	-0.529996	0.436379	-0.0860678	-0.320112	-0.344271
5520	0.747618	0.0275904	0.0915834	0.152367	0.529241	0.0805418	0.168397	0.514674	0.914886	0.0173533	0.914886	0.864127	0.715032	0.813794	0.2839		5520	-0.125524	0.723463	-0.594148	-0.518833	-0.24268	-0.610884	-0.502096	-0.251048	0.0418414	0.760504	0.0418414	0.0669462	-0.142261	0.092051	-0.401677
7526	0.312472	0.710085	0.356709	0.807065	0.656558	0.346764	0.98196	0.499231	0.800046	0.633054	0.294833	0.140649	0.377051	0.487441	0.683225		7526	-0.304069	0.114279	-0.278579	0.0752162	-0.136503	-0.28415	-0.00697405	-0.206148	-0.078002	0.146455	0.314794	0.431797	-0.267435	-0.21172	-0.12536
8303	0.297008	0.403817	0.464984	0.346298	0.539791	0.28625	0.0665555	0.510325	0.760122	0.610612	0.254864	0.362893	0.558963	0.772878	0.475258		8303	0.217191	0.174616	0.153106	-0.196576	0.128703	-0.221966	-0.372666	-0.138103	0.0642926	0.107026	-0.236584	-0.190036	-0.122716	-0.0607809	0.149644
9999	0.103031	0.222267	0.397495	0.771521	0.129268	0.796852	0.374299	0.651508	0.575894	0.701072	0.163578	0.655722	0.0861215	0.171832	0.369353		9999	0.333726	-0.253063	0.176938	-0.0611537	0.31174	-0.054223	-0.185642	-0.0949921	0.117506	-0.0807851	-0.287423	-0.093769	-0.350207	-0.282122	0.187538
10413	0.481551	0.461704	0.435133	0.0123985	0.488843	0.408889	0.700666	0.370108	0.308657	0.970998	0.935659	0.821081	0.225867	0.13373	0.521681		10413	-0.150894	0.15772	0.167102	-0.502176	0.148422	-0.176675	-0.0827526	-0.191471	0.216899	-0.00783972	-0.0174065	-0.048738	0.256745	0.315057	0.137511
12146	0.570415	0.532493	0.67493	0.597089	0.427599	0.875239	0.784657	0.0964021	0.973147	0.527955	0.894432	0.640919	0.426023	0.175762	0.491755		12146	0.119184	-0.131008	-0.0882314	-0.111077	0.166057	0.0330868	0.0575522	-0.339927	0.00709548	0.132449	-0.0279662	-0.0980786	0.166615	0.279662	-0.144164
12274	0.0687019	0.628208	0.781803	0.104502	0.529915	0.0468564	0.0936863	0.914748	0.0774419	0.0437815	0.964599	0.582253	0.562507	0.94588	0.943801		12274	0.369974	-0.10181	0.0583334	0.33239	-0.131826	0.40118	0.34256	-0.0225629	-0.359633	-0.406445	-0.00935536	0.115566	-0.12162	-0.0143082	0.0148585
14734	0.485249	0.941699	0.605031	0.618152	0.31276	0.413078	0.346677	0.677202	0.640462	0.767664	0.379243	0.647419	0.349018	0.348036	0.478458		14734	0.146314	-0.0154153	-0.108693	-0.104784	0.210389	-0.171251	-0.196425	-0.0875802	0.0982123	-0.0622142	-0.183762	-0.0961818	0.195492	0.195882	-0.148574
HNSC	normal																HNSC	normal
	MTCYB	MTND3	MTND5	MTCO3	MTATP6	MTRNR1	MTRNR2	MTCO1	MTATP8	MTND2	MTND1	MTCO2	MTND4L	MTND4	MTND6			MTCYB	MTND3	MTND5	MTCO3	MTATP6	MTRNR1	MTRNR2	MTCO1	MTATP8	MTND2	MTND1	MTCO2	MTND4L	MTND4	MTND6
585	0.779871	0.939512	0.275978	0.206922	0.773889	0.114942	0.0899201	0.394671	0.525717	0.375802	0.307351	0.359209	0.71765	0.357798	0.197817		585	-0.0444458	0.0120729	-0.172033	-0.198791	-0.0456856	-0.246906	-0.264967	-0.134807	0.100704	-0.140215	0.161346	-0.145105	-0.0574849	-0.145527	-0.202759
1610	0.824446	0.849911	0.259631	0.121412	0.00709924	0.00376764	0.37219	0.291065	0.000158487	0.395518	0.26843	0.0102545	0.236359	0.532283	0.158819		1610	-0.0362112	-0.0308926	-0.182522	-0.248919	0.419158	-0.447734	-0.144946	-0.171126	0.562446	-0.138075	0.179245	-0.401397	0.191563	0.101715	-0.227069
4271	0.801895	0.0353497	0.0934339	0.505402	0.424347	0.625945	0.575919	0.399434	0.272105	0.201884	0.934834	0.677978	0.666729	0.832948	0.619496		4271	-0.0415085	-0.337972	0.27238	-0.1099	0.131652	0.0805468	0.0923824	0.13879	0.180277	-0.208889	0.0135325	-0.0686439	0.0711863	0.0348998	0.0820491
5520	0.224176	0.825012	0.0747218	0.633427	0.24929	0.0567276	0.37014	0.839626	0.243571	0.286512	0.393131	0.186895	0.120551	0.461239	0.0488133		5520	0.22868	-0.0421406	-0.330213	-0.0907472	0.217042	-0.351617	-0.169643	0.0385731	0.219621	-0.201138	0.161752	-0.247715	0.289633	0.1398	-0.362766
7526	0.170645	0.663124	0.715594	0.151726	0.31257	0.48488	0.0839866	0.875669	0.288256	0.47621	0.291516	0.247966	0.107681	0.654269	0.106623		7526	0.233425	-0.0751501	-0.0628848	-0.243893	0.173142	-0.120233	-0.291992	-0.0270259	0.181931	0.122613	0.180726	-0.197619	0.272632	0.0772546	-0.273423
8303	0.125356	0.298224	0.294021	0.0091521	0.0505121	0.252518	0.663193	0.234819	0.107029	0.311527	0.409385	0.0619146	0.161978	0.304682	0.625482		8303	0.260206	-0.178273	0.179806	-0.428342	0.32842	-0.195766	-0.0751338	-0.203102	0.273119	-0.17351	-0.141804	-0.314306	0.238111	0.175944	-0.0841753
9999	0.953179	0.822982	0.264416	0.145649	0.521127	0.0863295	0.00624459	0.183586	0.393914	0.10852	0.0688324	0.426836	0.676959	0.791232	0.0706638		9999	-0.00958761	0.0365181	-0.180731	-0.23428	-0.104482	-0.274646	-0.425142	-0.214605	-0.13854	0.257619	0.290661	-0.129209	0.0679515	0.043205	-0.288844
10413	0.165805	0.464152	0.951773	2.94175e-05	0.817403	0.00169776	0.099601	0.147768	0.541974	0.131407	0.695414	1.57366e-06	0.531442	0.740333	0.225978		10413	0.223419	-0.119108	-0.00987582	-0.609904	0.0376886	-0.48056	-0.264109	-0.233089	0.0993335	-0.24264	0.0638664	-0.677501	0.101922	-0.0540773	-0.195791
12146	0.127467	0.943515	0.781779	0.983606	0.478086	0.713252	0.794182	0.814808	0.262574	0.755282	0.293832	0.689534	0.358727	0.65784	0.799295		12146	-0.241965	0.0114181	0.0446187	0.00331155	0.113949	-0.0591721	0.0420249	0.0377342	0.179085	-0.0501983	0.16797	-0.0643137	-0.147102	-0.0712854	0.0409586
12274	0.547976	0.95128	0.806886	0.201102	0.329839	0.387403	0.610098	0.679605	0.691329	0.196557	0.964637	0.274504	0.927319	0.888844	0.607368		12274	0.0953711	-0.00972103	0.0388778	-0.201313	0.154109	-0.136871	-0.0809995	0.0656396	0.0631099	-0.203318	0.00705397	-0.172554	0.0145126	-0.0222349	-0.0816168
14734	0.765366	0.552191	0.878901	0.339213	0.747772	0.165348	0.537359	0.753873	0.783508	0.137717	0.540662	0.767481	0.90711	0.612686	0.389235		14734	0.0474568	0.0943733	0.024238	-0.151183	0.0511313	-0.218061	-0.0979016	0.0498541	0.0436933	-0.232905	-0.0971119	-0.0470169	0.0185636	-0.0804151	0.136349
HNSC	tumour																HNSC	tumour
	MTCYB	MTND3	MTND5	MTCO3	MTATP6	MTRNR1	MTRNR2	MTCO1	MTATP8	MTND2	MTND1	MTCO2	MTND4L	MTND4	MTND6			MTCYB	MTND3	MTND5	MTCO3	MTATP6	MTRNR1	MTRNR2	MTCO1	MTATP8	MTND2	MTND1	MTCO2	MTND4L	MTND4	MTND6
585	0.0154468	0.0244899	0.199602	0.229576	0.74304	0.398019	0.329343	0.590347	0.660537	0.425022	0.615605	0.677441	0.0524337	0.0551277	0.265185		585	0.390178	-0.364418	0.212795	0.1996	-0.0549774	0.14113	0.162612	-0.0901629	0.073605	0.133284	-0.0841149	0.0697242	0.317058	0.313694	0.185371
1610	0.0051301	0.715182	0.113562	0.175641	0.746304	0.464709	0.568344	0.540474	0.400982	0.179044	0.105104	0.438606	0.746304	0.902923	0.111325		1610	0.522943	-0.0736139	-0.311636	0.268525	0.0652835	0.146888	-0.114862	0.123176	0.168444	-0.266501	-0.31877	0.15551	0.0652835	-0.0246353	-0.313484
4271	0.744306	0.651724	0.0518192	0.599288	0.855066	0.21687	0.304738	0.549639	0.873977	0.855864	0.294421	0.328788	0.202126	0.211259	0.0461304		4271	0.0702439	-0.0971005	0.401495	0.112937	0.0393724	-0.261619	-0.218621	0.128478	-0.0341918	-0.0391534	0.22322	-0.208259	0.269908	0.264728	0.41082
5520	0.180492	0.482361	0.0143735	0.541693	0.562144	1	0.287054	0.964235	0.641553	0.173782	0.0035731	0.0143735	0.964235	0.482361	0.0223004		5520	0.379748	0.204846	-0.636565	-0.178415	0.169604	0	0.306168	0.0132159	-0.136564	0.385214	-0.721632	0.636565	-0.0132159	0.204846	-0.603526
7526	0.860777	0.475648	0.223146	0.785441	0.965304	0.131574	0.0441055	0.930665	0.965304	0.599556	0.155257	0.819191	0.777056	0.982648	0.260903		7526	-0.0476901	0.192251	-0.322491	-0.0739658	0.0118345	-0.393498	-0.508885	-0.0236691	-0.0118345	0.142119	0.372579	-0.0621313	0.0769244	-0.00591726	-0.298822
8303	0.0206813	0.300468	0.375717	0.174922	0.564207	0.24932	0.81784	0.872712	0.764399	0.480423	0.787955	0.372863	0.823652	0.455271	0.722049		8303	0.384249	-0.17746	0.152143	0.231175	0.0993693	-0.197065	0.039776	0.0276741	-0.0517441	-0.121454	0.0464427	-0.153044	-0.0384863	-0.128459	0.0613979
9999	0.0833036	0.088649	0.78123	0.319919	0.738138	0.532418	0.43421	0.470914	0.972077	0.131742	0.343123	0.18152	0.345203	0.522306	0.443115		9999	0.277222	-0.272718	-0.0453255	0.161347	0.054551	0.101681	0.127176	-0.117325	-0.00571582	0.242436	-0.153878	0.215597	0.153224	0.104188	-0.124745
10413	0.270145	0.797528	0.666492	0.320385	0.619701	0.46727	0.744885	0.65514	0.545258	0.623866	0.526813	0.686535	0.448156	0.283677	0.820936		10413	0.181004	0.0424429	0.07124	0.163357	0.0820013	-0.119881	0.0538175	-0.0738227	-0.0998651	0.0810305	0.104462	-0.0667202	0.125047	0.176055	-0.0374494
12146	0.316152	0.277848	0.605238	0.593436	0.789141	0.727444	0.0654855	0.0695566	0.151399	0.447784	0.325431	0.367535	0.76678	0.923446	0.312098		12146	0.162591	-0.175814	-0.0842524	-0.08701	-0.0436477	-0.0568656	-0.294083	-0.289938	0.231076	0.123482	-0.159543	-0.146348	0.0484023	-0.0156903	-0.16394
12274	0.719872	0.817778	0.398413	0.0489784	0.612116	0.510509	0.0261058	0.28303	0.546551	0.199942	0.854092	0.834122	0.197504	0.342514	0.180112		12274	-0.0577476	-0.0371185	0.135462	0.309448	0.0815794	0.105751	0.347277	0.17172	-0.0969385	-0.20437	0.0296303	-0.0337396	-0.205459	-0.15208	0.213516
14734	0.0912621	0.693849	0.582609	0.284378	0.119699	0.267077	0.893462	0.226107	0.951584	0.675642	0.0774515	0.896353	0.718125	0.752216	0.782384		14734	0.263906	0.0625681	-0.0872734	0.169097	-0.243821	0.175207	0.0213058	-0.190812	0.00966035	-0.0664985	-0.275463	0.0207243	-0.0573841	-0.0502008	-0.0439257
KICH	normal																KICH	normal
	MTCYB	MTND3	MTND5	MTCO3	MTATP6	MTRNR1	MTRNR2	MTCO1	MTATP8	MTND2	MTND1	MTCO2	MTND4L	MTND4	MTND6			MTCYB	MTND3	MTND5	MTCO3	MTATP6	MTRNR1	MTRNR2	MTCO1	MTATP8	MTND2	MTND1	MTCO2	MTND4L	MTND4	MTND6
585	0.00664713	0.145731	0.863582	0.942006	0.386211	0.218792	0.75642	0.546718	0.0885921	0.088174	0.804976	0.699036	0.506585	0.489654	0.746163		585	-0.538379	0.306113	-0.0370371	-0.0156863	0.185226	-0.260567	0.0668122	0.129412	0.355121	-0.355556	0.0532055	0.0832246	0.142484	0.148148	-0.0697169
1610	0.667773	0.543998	0.166891	0.0578154	0.735937	0.231869	0.0902791	0.0626877	0.21423	0.0626877	0.237457	0.0800016	0.000172813	0.279218	0.443549		1610	0.092354	0.130283	0.291304	0.393913	0.0726245	0.253043	0.353378	0.386956	0.262609	-0.386956	-0.250653	0.365217	0.706087	0.229565	0.163478
4271	0.98033	0.524361	0.518309	0.259571	0.917817	0.754088	0.80728	0.891438	0.870413	0.741427	0.75632	0.402837	0.0621587	0.595289	0.567578		4271	0.00573102	0.147178	-0.149308	-0.257614	0.0239821	0.0727198	0.0566581	-0.0317182	-0.0379071	0.0765879	0.0720398	-0.19263	-0.413884	-0.123005	-0.132288
5520	0.771895	0.686531	0.631869	0.186446	0.533633	0.887869	0.727267	0.44291	0.497786	0.89645	0.148052	0.429691	0.331595	0.687411	0.504863		5520	-0.0787499	0.109467	-0.129794	0.348084	0.168142	-0.0383483	-0.0946746	-0.206491	0.182892	-0.0353984	-0.378698	0.21239	0.259588	0.109145	-0.179942
7526	0.581819	0.916865	0.825322	0.112539	0.939719	0.176482	0.328141	0.354994	0.621851	0.800819	0.321741	0.132826	0.287762	0.0505753	0.662847		7526	0.131052	0.0249434	-0.0527109	0.365964	0.0180723	-0.314759	-0.230537	0.218374	-0.11747	-0.060241	0.233522	0.347892	0.25	0.442772	-0.103916
8303	0.0664473	0.384758	0.0260557	0.627207	0.813188	0.00188075	0.001304	0.2275	0.554069	0.537761	0.396839	0.189011	0.401887	0.862171	0.0339617		8303	0.38072	-0.185783	-0.453438	-0.104439	0.0509249	-0.601393	-0.617532	-0.255875	0.127067	0.132289	0.181185	-0.277633	-0.179286	0.0374239	-0.434291
9999	0.755982	0.104631	0.769269	0.234298	0.724178	0.0065762	0.212111	0.878379	0.713714	0.579871	0.407537	0.331252	0.198845	0.897115	0.729922		9999	0.0669359	-0.339453	-0.0631895	-0.252294	0.0759834	-0.53897	-0.264252	0.0329887	0.0789869	0.118945	0.177178	-0.207225	-0.271808	0.0278777	-0.0743406
10413	0.368279	0.827005	0.527016	0.370108	0.086885	0.0238768	0.211275	0.521681	0.113442	0.269026	0.425078	0.624324	0.390367	0.211527	0.559554		10413	0.19219	-0.0470999	-0.13577	0.191471	0.35691	-0.45953	-0.264719	0.137511	0.331593	-0.234987	0.170732	0.105309	0.183638	0.264578	-0.125326
12146	0.180877	0.46596	0.463803	0.714667	0.55151	0.402199	0.442963	0.576406	0.274858	0.961395	0.0906553	0.608799	0.169154	0.446424	0.546151		12146	0.28261	0.156244	-0.156991	0.0787128	0.127882	-0.179169	-0.164306	0.120026	0.232224	0.010437	0.352992	-0.110024	0.290063	0.163079	-0.129593
12274	0.139432	0.406913	0.584351	0.0270894	0.926157	0.672148	0.430426	0.12095	0.557698	0.039787	0.774037	0.200445	0.504713	0.260113	0.858012		12274	-0.310739	0.17741	0.117551	0.45069	-0.0199834	-0.0910673	0.168795	0.32524	-0.125915	-0.422348	0.0618495	0.270879	0.143106	0.239284	0.0385642
14734	0.821923	0.258931	0.567828	0.671071	0.974236	0.444895	0.726052	0.567828	0.498001	0.205354	0.592646	0.935659	0.967805	0.967805	0.843157		14734	0.0485052	-0.239861	0.122716	-0.0913839	-0.00696409	-0.163621	-0.0754471	0.122716	-0.145344	-0.268059	-0.114983	0.0174065	0.00870322	0.00870322	0.0426458
KICH	tumour																KICH	tumour
	MTCYB	MTND3	MTND5	MTCO3	MTATP6	MTRNR1	MTRNR2	MTCO1	MTATP8	MTND2	MTND1	MTCO2	MTND4L	MTND4	MTND6			MTCYB	MTND3	MTND5	MTCO3	MTATP6	MTRNR1	MTRNR2	MTCO1	MTATP8	MTND2	MTND1	MTCO2	MTND4L	MTND4	MTND6
585	0.792006	0.783551	0.780444	0.830527	0.467278	0.615707	0.350471	0.0990931	0.222626	0.169803	0.179805	0.222626	0.392656	0.498001	0.913211		585	-0.0568185	-0.0591819	-0.0600522	-0.0461271	0.155788	-0.10792	-0.199304	-0.344648	0.258486	0.289641	-0.283278	0.258486	-0.182768	-0.145344	-0.0234987
1610	0.887246	0.956219	0.357886	0.646749	0.0435308	0.552903	0.223734	0.525776	0.0267159	0.0599753	0.874042	0.090348	0.685352	0.904502	0.342875		1610	0.030568	-0.0121739	0.195652	0.0982609	0.417391	-0.126956	-0.257391	-0.135652	0.454783	0.389425	-0.0341741	0.353913	-0.0869565	-0.026087	0.201739
4271	0.541763	0.324606	0.886247	0.492242	0.839059	0.507145	0.875318	0.92281	0.711606	0.381458	0.654243	0.386488	0.839059	0.904505	0.607422		4271	-0.134128	0.214968	0.031583	-0.150783	-0.0448274	-0.145689	-0.0346394	0.0213949	-0.0815044	0.191476	0.0986621	0.189498	-0.0448274	-0.0264889	0.113087
5520	0.745789	0.250755	0.554589	0.310834	0.214121	0.876212	0.431011	0.791594	0.190764	0.84233	0.833661	0.313054	0.861989	0.969392	0.55154		5520	0.0715004	0.249012	-0.129447	0.220356	0.268775	-0.034585	-0.171937	-0.0583004	0.282609	-0.0439049	0.0463511	0.219368	-0.0385375	0.00889328	-0.130435
7526	0.190854	0.719802	0.526628	0.930612	0.55932	0.411007	0.786231	0.188379	0.662289	0.114234	0.0299475	0.613378	0.296085	0.734419	0.690846		7526	-0.333477	0.093968	-0.165079	0.0228571	-0.152381	-0.213333	-0.0711109	-0.335237	-0.114285	0.397368	0.526408	-0.132063	-0.269205	-0.0888886	-0.104127
8303	0.421446	0.840417	0.501928	0.730877	0.225346	0.808721	0.670405	0.975669	0.0937279	0.90109	0.239239	0.308038	0.382254	0.193139	0.520429		8303	-0.172054	0.0434783	-0.143478	0.073913	0.256522	0.0521739	0.0913044	0.00695652	0.350435	0.0267953	0.249733	0.216522	0.186087	0.274783	-0.137391
9999	0.436347	0.611594	0.313363	0.566462	0.282148	0.560927	0.423843	0.935434	0.438377	0.138696	0.312595	0.0942713	0.782811	0.938656	0.263672		9999	-0.166667	-0.109171	0.214849	0.123145	0.228823	0.124892	0.171181	-0.0174674	0.16594	0.311289	0.215183	0.349348	0.0593892	0.016594	0.237557
10413	0.674375	0.293739	0.466314	0.173196	0.563941	0.402199	0.435437	0.597446	0.583384	0.558947	0.24471	0.162564	0.166496	0.198116	0.45383		10413	-0.0904135	0.223527	-0.156121	0.287454	0.12394	0.179169	0.166993	0.113503	0.117852	-0.125519	0.246939	0.294412	0.291803	0.272233	-0.16047
12146	0.04947	0.342875	0.637963	0.176248	0.288625	0.000355664	0.000279793	0.115053	0.384516	0.391778	0.694436	0.027358	0.090348	0.217367	0.673385		12146	-0.405244	-0.201739	-0.10087	0.285217	0.225217	0.68087	0.689565	0.330435	0.185217	-0.183101	-0.0845589	0.453043	0.353913	0.26087	-0.0904348
12274	0.862243	0.712622	0.489835	0.336477	0.128724	0.216175	0.589017	0.624847	0.148589	0.908603	0.644951	0.385943	0.80409	0.982169	0.440523		12274	-0.0374039	-0.0793014	-0.148088	0.205044	0.318958	0.262001	0.116104	0.105151	0.304061	0.0247514	0.099117	0.185329	-0.0534517	0.00481942	-0.165175
14734	0.106227	0.991889	0.811878	0.881984	0.122209	0.59194	0.426544	0.151683	0.139795	0.566102	0.51615	0.0189424	0.136365	0.286728	0.566706		14734	-0.337994	0.0026087	0.0513043	-0.0321739	0.324348	0.114783	0.169565	0.301739	0.310435	0.123258	-0.139325	0.47913	0.313043	0.226087	0.122609
KIRC	normal																KIRC	normal
	MTCYB	MTND3	MTND5	MTCO3	MTATP6	MTRNR1	MTRNR2	MTCO1	MTATP8	MTND2	MTND1	MTCO2	MTND4L	MTND4	MTND6			MTCYB	MTND3	MTND5	MTCO3	MTATP6	MTRNR1	MTRNR2	MTCO1	MTATP8	MTND2	MTND1	MTCO2	MTND4L	MTND4	MTND6
585	0.50123	0.976656	0.502475	0.408375	0.870773	0.695811	0.946774	0.721099	0.682652	0.0221831	0.151607	0.99518	0.0329282	0.0919523	0.0766385		585	-0.0817226	0.00356153	0.0814858	-0.100374	-0.0197982	-0.0475611	-0.00812531	0.0434303	0.0497317	-0.273074	-0.173202	0.00073521	-0.255293	-0.202971	0.213018
1610	0.278133	0.632093	0.277535	0.51809	0.887733	0.756315	0.592892	0.270502	0.193005	0.667063	0.905151	0.994724	0.833963	0.564326	0.0799639		1610	-0.131429	-0.0582254	0.131591	-0.0785415	0.0171815	-0.0377573	0.0650057	0.133517	0.15745	-0.0523235	-0.0145023	-0.000804836	-0.0255098	-0.0700732	0.21071
4271	0.673983	0.0815448	0.649312	0.19613	0.852046	0.379519	0.324364	0.107952	0.337213	0.132489	0.287577	0.220827	0.201546	0.587164	0.336177		4271	-0.0511701	0.209639	0.0553033	0.156365	-0.0226978	0.106655	0.119522	0.193792	0.11641	-0.181576	-0.128896	0.148195	-0.154513	-0.0660127	0.116658
5520	0.708532	0.462758	0.273339	0.0274861	0.062969	0.301961	0.121718	0.0419333	0.800568	0.817845	0.330924	0.583103	0.415358	0.808208	0.140382		5520	0.0472587	-0.0926823	-0.137894	-0.27351	-0.231976	-0.130011	-0.193892	-0.253096	0.0319445	0.0291265	0.122515	-0.0693409	0.102752	-0.0306965	-0.18488
7526	0.490223	0.0275775	0.705929	0.173596	0.5019	0.915389	0.426505	0.135411	0.699286	0.45036	0.00591894	0.212075	0.68552	0.727667	0.372439		7526	-0.0844551	0.265313	0.0462456	0.165706	0.0822043	0.0130277	0.097279	0.181567	0.0473419	-0.092362	-0.328099	0.15213	0.0496259	-0.0426827	0.109045
8303	0.839007	0.887683	0.893915	0.470163	0.82998	0.999406	0.597747	0.450579	0.50128	0.371115	0.0281049	0.306623	0.521693	0.389234	0.55518		8303	-0.0249094	0.0173179	0.0163514	-0.0883887	-0.0263266	-9.13484e-05	0.0646351	-0.0923175	-0.0823232	-0.109346	-0.264451	-0.124873	-0.07845	-0.105288	0.0722566
9999	0.597738	0.678339	0.955502	0.677215	0.999487	0.965369	0.3846	0.683471	0.107208	0.160818	0.236427	0.663125	0.311193	0.784637	0.29703		9999	-0.0641571	-0.0504465	0.00679153	-0.0506331	-7.82886e-05	0.00528448	0.105529	-0.0495962	0.194195	-0.169446	-0.14336	-0.0529818	-0.122796	-0.0332531	0.126416
10413	0.0954744	0.82972	0.490374	0.175152	0.287216	0.13852	0.00959306	0.652631	0.961104	0.849461	0.520242	0.874481	0.966035	0.757454	0.600058		10413	-0.200849	0.0261715	-0.0838003	0.163906	-0.128992	0.178842	0.307578	0.0547438	-0.00593571	-0.023099	-0.0781392	0.0192254	0.0051828	0.0375753	-0.0637519
12146	0.207051	0.848737	0.886472	0.0249191	0.441232	0.0957757	0.0298393	0.619884	0.513939	0.815883	0.392703	0.761329	0.751808	0.603907	0.458936		12146	-0.152667	0.0232115	-0.0173758	0.267951	0.0935283	0.20067	0.259831	0.0603171	-0.0793197	-0.0283347	-0.103751	0.0369563	-0.0384787	0.0630813	0.0899586
12274	0.849777	0.396404	0.569512	0.516016	0.620517	0.850748	0.433847	0.998096	0.187227	0.275084	0.92782	0.235393	0.740309	0.739199	0.590695		12274	-0.02305	-0.102946	-0.0691447	-0.0789299	-0.0602083	0.0228993	0.0950408	-0.000290432	0.159491	-0.132258	-0.0110256	-0.143673	0.0403251	0.0405038	-0.0653914
14734	0.886048	0.369708	0.559364	0.510079	0.727601	0.083802	0.389759	0.364124	0.975115	0.796188	0.368627	0.608982	0.316243	0.912886	0.0664502		14734	-0.0174412	0.108855	0.0709655	0.0800462	0.0423764	0.208138	0.104395	0.110123	-0.00379673	-0.0314291	-0.1091	0.0621998	-0.12153	0.0133148	0.22063
KIRC	tumour																KIRC	tumour
	MTCYB	MTND3	MTND5	MTCO3	MTATP6	MTRNR1	MTRNR2	MTCO1	MTATP8	MTND2	MTND1	MTCO2	MTND4L	MTND4	MTND6			MTCYB	MTND3	MTND5	MTCO3	MTATP6	MTRNR1	MTRNR2	MTCO1	MTATP8	MTND2	MTND1	MTCO2	MTND4L	MTND4	MTND6
585	0.443138	0.422308	0.241043	0.0574669	0.163397	0.0511421	0.834772	0.23228	0.324997	0.0200945	0.120846	0.844199	0.441404	0.790733	0.599773		585	-0.0931401	0.0974338	-0.141972	-0.228166	-0.168423	0.234069	-0.0253837	-0.144623	-0.119367	0.277359	-0.187135	-0.0239165	-0.0934932	-0.0322896	-0.0638016
1610	0.96353	0.0696277	0.601905	0.135382	0.697485	0.133365	0.989396	0.813017	0.51066	0.984045	0.119914	0.0567074	0.0788322	0.0745457	0.750929		1610	0.00583039	0.228285	-0.0664453	-0.188689	0.0495362	0.189651	-0.00169472	-0.0301545	-0.0837321	0.00254998	-0.196364	0.239437	0.221316	0.224476	0.0404579
4271	0.063381	0.887784	0.853286	0.276889	0.322775	0.0656873	0.0702144	0.510761	0.0997783	0.0710898	0.603514	0.964714	0.228179	0.864672	0.896812		4271	-0.243257	-0.0187709	0.0245982	-0.1439	-0.130974	0.241229	0.237407	-0.0873237	-0.216364	0.236691	0.06901	-0.00588535	0.15929	0.0226702	-0.017252
5520	0.835345	0.959224	0.854425	0.00639829	0.369344	0.09583	0.807405	0.177858	0.651388	0.996957	0.385404	0.412575	0.496154	0.603168	0.252106		5520	0.0298382	0.00734112	0.0263402	-0.376955	-0.128365	0.235749	-0.0349924	-0.191668	-0.0648096	-0.000547626	-0.124148	-0.117245	0.0974859	0.0745401	0.163336
7526	0.339176	0.904706	0.434178	0.161599	0.31377	0.0324528	0.0240606	0.947199	0.524298	0.898086	0.295405	0.218378	0.467427	0.764902	0.380095		7526	-0.122416	0.0153904	-0.10029	0.178502	-0.128965	0.269845	0.284055	0.00851383	-0.0817231	-0.0164651	-0.133913	0.157255	0.0932192	-0.0384325	-0.112484
8303	0.223726	0.698295	0.665886	0.118819	0.0730769	0.337823	0.694044	0.341271	0.116189	0.257184	0.814091	0.614719	0.586074	0.39862	0.537617		8303	-0.152989	0.0490005	-0.0545773	-0.195384	-0.223827	0.120792	-0.0497266	-0.119939	-0.196763	-0.142587	-0.0297376	-0.0636036	0.0687958	-0.106464	-0.077852
9999	0.498476	0.325157	0.357479	0.179048	0.140329	0.382461	0.327317	0.713434	0.0367465	0.763406	0.31838	0.789342	0.484885	0.373373	0.747365		9999	-0.0883245	0.128108	-0.119871	-0.174328	-0.191007	0.113814	0.127542	-0.047987	-0.268044	-0.0393395	-0.129899	-0.0349189	-0.0911285	-0.115989	-0.0420953
10413	0.249456	0.0352504	0.30279	0.120311	0.0127423	0.128348	0.77704	0.192726	0.000795759	0.883337	0.324354	0.535429	0.673763	0.772778	0.419753		10413	-0.142663	0.257712	-0.127779	-0.191629	-0.302828	0.187654	0.0352483	-0.161123	-0.40006	0.0182694	-0.122252	-0.0770507	0.0523824	-0.0359405	-0.10021
12146	0.195012	0.0359182	0.296771	0.539811	0.299292	0.0170327	0.14388	0.304144	0.0315303	0.820743	0.48258	0.349394	0.878801	0.925043	0.669167		12146	-0.159097	0.254909	-0.128385	-0.0756449	-0.127722	0.288512	0.179116	-0.126457	-0.261064	-0.0279916	-0.0865946	-0.115236	-0.0188396	0.0116245	0.0527587
12274	0.981468	0.628077	0.979991	0.617516	0.514592	0.394017	0.856049	0.810291	0.710354	0.613493	0.933443	0.505129	0.421542	0.664286	0.896229		12274	0.00284841	-0.0593521	0.0030755	-0.0611788	0.0797883	0.104236	0.0222423	-0.0294302	0.0455174	0.0618783	-0.0102407	0.0815867	0.0983214	0.0531825	0.0159926
14734	0.389884	0.794152	0.375286	0.894294	0.158463	0.784969	0.627715	0.744671	0.00891619	0.463828	0.0648701	0.431507	0.235631	0.717061	0.978089		14734	-0.104367	-0.0317501	-0.1076	-0.0161715	-0.170391	-0.0332006	0.0589734	-0.0396237	-0.310409	-0.0889858	-0.221893	-0.0955232	-0.143601	-0.0440866	-0.00334281
KIRP	normal																KIRP	normal
	MTCYB	MTND3	MTND5	MTCO3	MTATP6	MTRNR1	MTRNR2	MTCO1	MTATP8	MTND2	MTND1	MTCO2	MTND4L	MTND4	MTND6			MTCYB	MTND3	MTND5	MTCO3	MTATP6	MTRNR1	MTRNR2	MTCO1	MTATP8	MTND2	MTND1	MTCO2	MTND4L	MTND4	MTND6
585	0.778924	0.897177	0.557444	0.699405	0.808507	0.581307	0.0305779	0.737523	0.451473	0.452689	0.144206	0.566935	0.810122	0.920617	0.379594		585	0.0516467	-0.0237878	0.107687	-0.0709962	-0.0445953	-0.101266	-0.382817	0.0616401	-0.137956	0.13759	0.264047	-0.105118	-0.0442121	-0.0183453	0.160705
1610	0.49163	0.639251	0.95706	0.982818	0.3174	0.549542	0.751619	0.461891	0.613495	0.535129	0.880891	0.821017	0.892056	0.705903	0.963926		1610	0.128277	0.087628	0.0100847	0.00403389	0.185634	0.111739	0.05923	0.137152	0.0943929	0.115773	0.0280598	0.0423558	0.0254135	0.070593	0.00847116
4271	0.375646	0.52872	0.311978	0.642082	0.986411	0.839725	0.945423	0.0830863	0.317761	0.967746	0.192379	0.195274	0.921164	0.765576	0.211422		4271	0.162023	-0.115587	0.184536	0.0854117	-0.00313552	0.0372207	0.0126023	0.311086	0.182381	0.00744414	0.236566	0.235078	0.0182185	-0.0548515	0.227046
5520	0.79176	0.0610062	0.67034	0.304787	0.675772	0.71072	0.749235	0.301105	0.942356	0.0797707	0.136855	0.389961	0.48737	0.483347	0.491409		5520	0.0512505	0.352143	-0.0825428	0.197364	-0.0811044	-0.0719478	0.0620284	-0.198842	0.0140446	0.330664	-0.283006	0.165825	0.134286	0.135518	-0.133054
7526	0.805314	0.114485	0.294678	0.52351	0.277671	0.498229	0.523074	0.762468	0.901399	0.298635	0.821976	0.128924	0.722398	0.14918	0.365024		7526	0.0487137	0.305028	-0.204707	0.125342	0.212486	0.133005	-0.125947	-0.0596607	0.0246305	0.203065	0.044531	0.293924	-0.0700602	0.279693	-0.17734
8303	0.241735	0.656215	0.370647	0.42669	0.540831	0.995233	0.273956	0.228352	0.457292	0.231963	0.653416	0.707774	0.229952	0.29263	0.312294		8303	0.213035	0.0818142	0.163703	0.145555	0.112232	0.00109991	0.199376	0.219065	0.136205	0.217415	0.0825242	0.0689276	0.218332	0.191934	0.184418
9999	0.0261745	0.285095	0.835039	0.449683	0.439543	0.0222086	0.392727	0.66916	0.160287	0.484216	0.580498	0.155815	0.00961865	0.0379936	0.631868		9999	0.392761	0.194899	0.0383239	0.138497	0.141585	-0.40297	-0.156377	0.0785451	0.254228	0.128252	0.101482	0.256884	0.45078	0.368441	-0.0880312
10413	0.00168987	0.378473	0.0794538	0.631955	0.255027	0.0769009	0.188693	0.0586947	0.0899172	0.77868	0.670394	0.230266	0.000774331	0.0919652	0.344508		10413	0.532869	-0.161078	0.314632	0.0880088	0.207263	-0.317198	0.238484	0.337734	0.304731	-0.0517052	0.0782345	0.218189	0.56399	0.302897	0.172717
12146	0.0430949	0.918692	0.311022	0.247501	0.387622	0.00976737	0.956904	0.0969243	0.0249398	0.646699	0.862802	0.0404106	0.00489947	0.0207067	0.639492		12146	0.35982	0.0187917	0.184384	0.210044	0.158049	-0.453446	-0.00994855	0.298754	0.397727	0.0839443	-0.0318062	0.365469	0.489736	0.409457	0.0857771
12274	0.436467	0.498751	0.644383	0.782722	0.137941	0.559398	0.340686	0.145095	0.0418627	0.545753	0.533769	0.327906	0.140498	0.0321968	0.634438		12274	0.142529	0.124054	-0.084824	0.0507377	0.268087	0.107156	0.17407	0.263483	0.361824	0.110878	-0.114184	0.178659	0.266422	0.379455	-0.0873706
14734	0.573252	0.481617	0.361392	0.377659	0.748145	0.837389	0.477836	0.706237	0.525047	0.933325	0.982156	0.69291	0.135205	0.589798	0.539575		14734	0.10342	-0.12901	0.16685	0.16135	-0.0590609	0.0377704	0.130116	0.0693069	0.116612	-0.0154015	0.00411761	0.0726073	0.269894	0.0990099	0.112578
KIRP	tumour																KIRP	tumour
	MTCYB	MTND3	MTND5	MTCO3	MTATP6	MTRNR1	MTRNR2	MTCO1	MTATP8	MTND2	MTND1	MTCO2	MTND4L	MTND4	MTND6			MTCYB	MTND3	MTND5	MTCO3	MTATP6	MTRNR1	MTRNR2	MTCO1	MTATP8	MTND2	MTND1	MTCO2	MTND4L	MTND4	MTND6
585	0.838347	0.89832	0.227225	0.891766	0.118735	0.63293	0.592329	0.243969	0.858694	0.893692	0.556738	0.716964	0.661749	0.927455	0.257497		585	0.037545	-0.023522	-0.219584	-0.0250469	-0.281379	-0.0877581	0.0983403	-0.212051	0.0327681	-0.0245986	0.107879	-0.0666661	0.0804136	0.0167607	-0.206213
1610	0.592209	0.878054	0.129749	0.803517	0.196791	0.263672	0.344868	0.500102	0.701939	0.0307401	0.210896	0.164677	0.703302	0.101778	0.0347129		1610	0.112548	0.0323348	-0.311369	0.0524086	0.267104	0.23237	0.197148	-0.141426	-0.0805397	0.432704	-0.259188	0.286706	0.0801543	0.334875	-0.423893
4271	0.994675	0.951607	0.686298	0.0669949	0.897879	0.53602	0.182594	0.726085	0.976073	0.232937	0.0895312	0.420872	0.789631	0.846679	0.686298		4271	-0.00132156	0.0120167	-0.0798451	-0.351055	0.0254088	0.122077	-0.259367	-0.0692871	0.00593889	-0.232926	0.326889	-0.15837	0.0527902	0.0382729	-0.0798451
5520	0.528058	0.0414713	0.159095	0.0588521	0.0561879	0.274648	0.0954973	0.0842871	0.0291366	0.622561	0.581902	0.449464	0.436917	0.971326	0.105296		5520	0.124452	0.387751	-0.273474	-0.361347	-0.364955	-0.213797	-0.321282	-0.332056	-0.412538	-0.0972336	0.108702	-0.148919	0.153025	0.00711744	-0.31262
7526	0.512457	0.52493	0.761565	0.208802	0.212791	0.717936	0.0869853	0.893872	0.297339	0.782362	0.161799	0.607467	0.775499	0.850865	0.51668		7526	0.131741	-0.127901	-0.0612373	0.249848	0.247743	0.0728724	0.335632	-0.0269444	0.208207	-0.05576	-0.277052	0.103491	-0.057563	0.0379671	-0.130435
8303	0.62705	0.898587	0.480123	0.988876	0.160734	0.320096	0.667868	0.138542	0.736156	0.922172	0.398466	0.0426926	0.0702909	0.00341568	0.428963		8303	-0.0892727	0.0234598	0.129446	-0.00256692	0.253965	0.181518	0.0788701	0.267693	-0.0619729	-0.0179849	0.154512	0.360469	0.324166	0.502017	0.144848
9999	0.552013	0.527998	0.848333	0.0720537	0.371984	0.866323	0.269637	0.221711	0.675593	0.878846	0.42729	0.840261	0.39658	0.425068	0.947969		9999	-0.109166	0.115788	-0.0351977	-0.322259	-0.163252	-0.0309824	-0.201143	-0.222146	-0.0769292	0.0280575	0.145368	-0.0370946	0.155123	0.14606	-0.0120136
10413	0.380361	0.661131	0.198334	0.21096	0.465722	0.175343	0.686795	0.614638	0.356267	0.127345	0.482479	0.171703	0.151585	0.0855745	0.326709		10413	0.16045	0.0805698	0.233521	-0.22727	0.133689	0.245657	0.0741289	0.0924892	-0.168613	-0.275238	0.128758	0.24768	0.259448	0.308726	0.179094
12146	0.775864	0.730553	0.0143993	0.898492	0.790052	0.0494136	0.0952097	0.0644461	0.84276	0.283672	0.304509	0.116199	0.0615166	0.0622772	0.0309025		12146	0.0523801	-0.063339	0.428545	0.0234819	-0.0489863	0.350211	0.300055	0.330765	-0.0365071	-0.195465	0.187357	0.283251	0.334251	0.333334	0.382132
12274	0.476264	0.00202577	0.111819	0.143694	0.740095	0.00657545	0.0806213	0.896119	0.678259	0.668766	0.787424	0.685658	0.904072	0.975966	0.314781		12274	0.130577	-0.525191	-0.286557	0.264372	-0.0610145	0.470508	0.313479	-0.0240338	0.0762611	-0.0786442	-0.0496136	-0.0744124	0.0221851	0.00554626	-0.183489
14734	0.0417372	0.709029	0.766126	0.710292	0.27881	0.671902	0.55356	0.895241	0.770709	0.0522165	0.876722	0.576833	0.533666	0.884201	0.521811		14734	0.362031	-0.0686182	-0.0547192	0.0683071	-0.197411	0.0778554	0.108744	-0.024238	-0.0536174	-0.34626	0.028553	-0.102461	0.114212	-0.0268087	-0.117518
LIHC	normal																LIHC	normal
	MTCYB	MTND3	MTND5	MTCO3	MTATP6	MTRNR1	MTRNR2	MTCO1	MTATP8	MTND2	MTND1	MTCO2	MTND4L	MTND4	MTND6			MTCYB	MTND3	MTND5	MTCO3	MTATP6	MTRNR1	MTRNR2	MTCO1	MTATP8	MTND2	MTND1	MTCO2	MTND4L	MTND4	MTND6
585	0.865018	0.0946924	0.109874	0.145827	0.204004	0.17722	0.487572	0.367417	0.485729	0.40363	0.0389291	0.952293	0.266636	0.433054	0.323916		585	0.0249239	0.241422	-0.231256	-0.210875	-0.184663	-0.19595	-0.101532	-0.131596	-0.10196	-0.122011	-0.295986	0.00877308	-0.161821	-0.114585	-0.1439
1610	0.0601042	0.0920424	0.164088	0.76146	0.924702	0.0759158	0.568593	0.605832	0.500558	0.747745	0.934604	0.550867	0.932021	0.81034	0.0327573		1610	0.289065	0.260139	-0.216045	-0.0476716	0.0148498	-0.27354	-0.0894032	-0.0809503	-0.105548	0.0505027	-0.0128925	0.0935154	-0.0134029	0.0376956	-0.326238
4271	0.91102	0.426536	0.447504	0.662463	0.504465	0.2287	0.280443	0.632925	0.619773	0.173516	0.267362	0.210163	0.984094	0.903916	0.463631		4271	-0.0163866	0.116205	-0.111042	-0.0639462	0.0976469	-0.175148	-0.157287	-0.0699528	0.0726637	0.197606	0.161578	0.182218	0.00292356	-0.0177008	-0.107162
5520	0.685056	0.86572	0.177373	0.526928	0.676052	0.836052	0.262321	0.659747	0.0898945	0.365789	0.471022	0.607665	0.491203	0.860738	0.157282		5520	0.0600701	0.0250639	-0.197981	-0.0935888	-0.0618859	0.0306715	0.165029	-0.0651973	-0.247489	-0.13347	-0.106553	0.0760002	-0.101786	-0.0260029	-0.207372
7526	0.509149	0.940109	0.472929	0.559976	0.425222	0.553519	0.712616	0.966829	0.432837	0.482108	0.966292	0.206356	0.407201	0.922317	0.720131		7526	0.101001	-0.0115241	0.109756	-0.0892274	-0.121854	-0.0906937	0.0564545	-0.00637862	0.119874	-0.107505	0.00648193	-0.192018	0.126619	-0.0149568	-0.0549148
8303	0.667609	0.826537	0.602538	0.489844	0.642456	0.731247	0.804644	0.906714	0.879487	0.313293	0.67537	0.812088	0.914326	0.58917	0.677805		8303	0.0622462	-0.031788	0.0754491	-0.0999424	-0.0672846	0.0498031	0.0358755	-0.0170012	-0.021996	-0.14552	0.0607065	-0.0344828	0.0156085	0.0782346	0.0602248
9999	0.84044	0.708694	0.0620774	0.685233	0.916628	0.570933	0.611733	0.736142	0.623933	0.493937	0.136291	0.813066	0.860866	0.924722	0.0320291		9999	0.0292051	-0.0541678	0.26581	0.0587592	-0.0151875	0.0820809	-0.0735486	0.0488618	0.0710458	-0.0990069	0.213644	0.0342999	0.0254263	0.0137086	0.303694
10413	0.410505	0.565922	0.541045	0.461318	0.263332	0.0943605	0.394204	0.576256	0.692602	0.878122	0.735842	0.741592	0.935065	0.376449	0.19348		10413	0.118986	0.0831477	-0.0885102	-0.10658	-0.161227	-0.239176	-0.123149	-0.0809527	-0.0573112	-0.022247	0.0489193	0.0478158	-0.0118207	0.1278	-0.187
12146	0.226947	0.343577	0.0474712	0.463437	0.942189	0.524914	0.787948	0.588348	0.330195	0.68882	0.602168	0.0209577	0.229569	0.787693	0.215811		12146	-0.173967	0.136771	-0.281727	0.10608	-0.0105215	0.0920512	-0.0390113	-0.0784069	-0.140575	-0.0580536	-0.0755256	0.325782	-0.173004	-0.0390593	-0.178145
12274	0.0962514	0.955231	0.301446	0.897983	0.619485	0.8418	0.341449	0.0755164	0.515512	0.101329	0.601788	0.0454443	0.846097	0.227469	0.635673		12274	0.237853	0.0081451	0.149088	-0.0186005	-0.0719559	-0.028953	-0.13737	0.253638	-0.0941399	0.234399	0.0756045	-0.28424	0.0281567	0.173775	-0.0686567
14734	0.326324	0.450677	0.816468	0.500406	0.676606	0.54503	0.885503	0.585982	0.565108	0.610262	0.88466	0.598854	0.725779	0.664027	0.49491		14734	-0.141693	0.109113	-0.0336647	0.0975364	0.060462	0.0876435	-0.0208904	0.0789031	-0.0833213	-0.0738519	-0.0210452	0.0762138	-0.0508572	-0.0629592	0.098785
LIHC	tumour																LIHC	tumour
	MTCYB	MTND3	MTND5	MTCO3	MTATP6	MTRNR1	MTRNR2	MTCO1	MTATP8	MTND2	MTND1	MTCO2	MTND4L	MTND4	MTND6			MTCYB	MTND3	MTND5	MTCO3	MTATP6	MTRNR1	MTRNR2	MTCO1	MTATP8	MTND2	MTND1	MTCO2	MTND4L	MTND4	MTND6
585	0.902161	0.807735	0.691238	0.146731	0.618074	0.814164	0.661321	0.300095	0.978212	0.659438	0.740486	0.598163	0.994244	0.349107	0.209164		585	0.0195572	0.0387035	-0.0631294	-0.22784	0.079202	-0.0373858	-0.0696176	-0.163753	-0.00434527	0.0700296	0.0526605	-0.083708	-0.00114781	0.148149	-0.197833
1610	0.225359	0.509018	0.663656	0.0235589	0.956718	0.0980489	0.15213	0.0261626	0.433781	0.383275	0.0856183	0.0123618	0.898765	0.544161	0.876629		1610	-0.228113	0.125418	-0.082777	-0.412328	-0.0103483	-0.307744	-0.268032	-0.40561	-0.14842	0.165101	0.319135	-0.451046	-0.0242546	0.115265	-0.029595
4271	0.0879046	0.114786	0.403965	0.414662	0.0746882	0.88823	0.601932	0.0378163	0.186543	0.292421	0.42765	0.706	0.366296	0.365795	0.982923		4271	-0.260311	0.241166	-0.129001	-0.126112	-0.271447	0.0218132	-0.080836	-0.314164	-0.202892	0.162337	0.122661	0.0585057	-0.139547	-0.139691	0.00332255
5520	0.623323	0.0183065	0.557159	0.127005	0.165463	0.550559	0.110627	0.34539	0.479268	0.128019	0.621316	0.823952	0.324976	0.764534	0.550998		5520	0.0822879	0.380908	-0.0982871	-0.251956	-0.229641	-0.0999289	-0.263011	-0.157367	-0.118317	0.251308	-0.0827622	-0.0373228	-0.164067	-0.0502381	-0.0998194
7526	0.964271	0.433833	0.770532	0.397255	0.745684	0.0662626	0.260341	0.398269	0.224979	0.626472	0.339217	0.72062	0.130219	0.0604211	0.0664717		7526	0.0075178	0.130785	-0.0489226	-0.141357	0.0543921	-0.301045	-0.187228	-0.141056	0.201543	0.0815452	0.159367	0.0599661	0.249914	0.307451	-0.300824
8303	0.690365	0.691637	0.137471	0.133432	0.177014	0.0105585	0.0893254	0.473993	0.139937	0.0234313	0.692911	0.314001	0.0767182	0.00190379	0.806975		8303	0.0577502	-0.0575004	0.213018	-0.215179	0.194007	-0.358568	-0.242801	0.103605	0.211722	0.320118	0.0572506	0.14531	0.252635	0.428534	0.035439
9999	0.388617	0.734507	0.698577	0.0730137	0.843814	0.261656	0.255983	0.101707	0.554092	0.0123985	0.0383268	0.183682	0.729461	0.813037	0.781115		9999	-0.124599	-0.0491759	0.0561411	-0.255766	-0.0285797	-0.161787	-0.1637	-0.234147	0.0856835	0.351177	0.293862	-0.191115	0.050147	0.0343055	-0.0402996
10413	0.461375	0.0813138	0.264556	0.447779	0.26013	0.957476	0.80033	0.995745	0.48857	0.756006	0.363815	0.440171	0.743334	0.574023	0.105655		10413	-0.106567	0.248913	-0.16082	-0.109808	0.162299	-0.00773638	-0.0366841	-0.000773824	0.100235	0.0450613	-0.131189	-0.111646	0.047482	0.0814254	-0.23156
12146	0.0453055	0.00131864	0.0439173	0.445505	0.666786	0.821546	0.714186	0.294323	0.226302	0.45677	0.0373035	0.248328	0.233134	0.911143	0.41982		12146	-0.284415	0.441787	-0.286195	-0.110356	-0.0624099	0.0327176	-0.0531008	-0.151277	-0.174206	0.107659	-0.295364	0.166326	-0.171707	-0.0161906	-0.11665
12274	0.936293	0.798436	0.717221	0.882635	0.865682	0.352566	0.665825	0.827237	0.636533	0.791279	0.544151	0.989531	0.730087	0.738888	0.732009		12274	-0.0115968	-0.0370395	0.052512	-0.0214173	-0.0245379	0.134268	0.0626011	-0.0316576	0.0684825	0.0383843	-0.0878344	-0.00190376	0.0500266	0.0483343	-0.0496564
14734	0.850624	0.00169806	0.0876455	0.510888	0.572258	0.797357	0.336227	0.45858	0.0146671	0.127316	0.105156	0.0415605	0.00518184	0.278451	0.675288		14734	-0.0273187	0.432718	-0.244046	0.0951741	-0.0817998	0.037242	-0.138849	-0.107229	-0.343262	0.218547	-0.231883	0.289324	-0.389454	-0.156282	0.0607228
LUAD	normal																LUAD	normal
	MTCYB	MTND3	MTND5	MTCO3	MTATP6	MTRNR1	MTRNR2	MTCO1	MTATP8	MTND2	MTND1	MTCO2	MTND4L	MTND4	MTND6			MTCYB	MTND3	MTND5	MTCO3	MTATP6	MTRNR1	MTRNR2	MTCO1	MTATP8	MTND2	MTND1	MTCO2	MTND4L	MTND4	MTND6
585	0.374728	0.49771	0.635492	0.714185	0.895511	0.787757	0.288584	0.66895	0.269795	0.0318297	0.921465	0.339768	0.4953	0.0424426	0.912982		585	0.120909	-0.0925064	-0.0647359	-0.0500389	0.0179538	-0.0367943	-0.144324	-0.0584076	0.150013	0.287247	-0.0134779	-0.129956	0.0930233	0.272154	-0.0149391
1610	0.279024	0.653685	0.270576	0.505082	0.385203	0.52782	0.942827	0.843242	0.138918	0.31553	0.692593	0.664963	0.0558637	0.00177767	0.0358789		1610	0.151446	0.0630692	-0.154104	0.0935831	0.121735	-0.088664	0.0100914	0.0278209	0.205996	0.140532	0.0555874	0.0608834	0.264258	0.419289	-0.288934
4271	0.0334776	0.137273	0.932092	0.118287	0.540615	0.633103	0.321047	0.45414	0.698664	0.0563352	0.253947	0.863101	0.927052	0.567787	0.558909		4271	-0.304368	-0.215349	0.0124954	-0.226079	-0.0895476	0.0699161	0.144747	-0.109436	0.0567233	0.274458	0.166127	-0.0252814	0.0134253	0.083632	0.0855499
5520	0.125389	0.394526	0.0941423	0.550024	0.654982	0.181824	0.264736	0.515333	0.689731	0.959498	0.238088	0.798355	0.465162	0.744656	0.504881		5520	0.264014	0.148512	-0.28738	-0.104553	-0.0782579	-0.231006	-0.193758	0.113737	-0.0699377	0.0089074	-0.204734	-0.0447884	-0.127583	0.0570805	-0.116563
7526	0.9522	0.607661	0.0306848	0.109345	0.189624	0.545481	0.792726	0.0507839	0.0765174	0.00932946	0.641636	0.127053	0.528205	0.0592417	0.0687426		7526	0.00869729	0.0743885	-0.305998	0.229208	0.188602	0.0875455	0.0381122	0.277801	0.252802	0.364151	0.0674503	0.218694	0.0913245	0.268644	-0.259536
8303	0.304735	0.632881	0.170252	0.294202	0.593329	0.0961717	0.157899	0.956468	0.375228	0.0374113	0.422002	0.62798	0.0301292	0.534725	0.652438		8303	0.151271	-0.0707244	0.201217	-0.154565	0.0790417	-0.242926	-0.207071	0.00809211	0.130886	0.301324	0.118613	-0.0717428	0.313311	0.0918373	-0.066692
9999	0.807918	0.0476127	0.0483335	0.325279	0.107281	0.838394	0.137861	0.0279219	0.713709	0.340572	0.900783	0.191474	0.720847	0.685408	0.113143		9999	-0.0352626	0.281554	-0.280684	-0.141996	-0.230516	0.0295847	-0.212812	-0.311009	-0.0531931	0.137618	-0.0180874	-0.187831	-0.0518102	-0.0587248	-0.226849
10413	0.0658561	0.934325	0.557731	0.943838	0.987268	0.119427	0.595999	0.573321	0.745818	0.0395431	0.920511	0.174076	0.996288	0.087192	0.0658209		10413	0.262191	0.0119558	-0.0849009	0.0102209	0.00231528	-0.223076	-0.0768082	-0.0815743	-0.0470064	0.292119	-0.0144779	0.195306	0.000674964	0.244385	-0.262224
12146	0.184656	0.0712271	0.266234	0.223204	0.930435	0.179576	0.595661	0.181388	0.0555832	0.00762506	0.842451	0.175796	0.333953	0.793427	0.176389		12146	0.186878	0.252243	-0.157034	0.171831	0.0124072	0.189023	-0.0753142	-0.188253	-0.267112	0.365981	0.0282441	0.190648	-0.136678	-0.0372058	-0.190391
12274	0.543507	0.817811	0.431683	0.1173	0.314719	0.981326	0.404378	0.377672	0.187184	0.428158	0.140946	0.293757	0.607703	0.539734	0.852696		12274	-0.084502	-0.032091	-0.109239	-0.215664	-0.139406	-0.00326154	0.115797	-0.122464	0.182244	-0.110072	0.203009	-0.145518	0.0714411	-0.0852915	0.0258689
14734	0.387341	0.069778	0.437937	0.000445159	0.289647	0.0207388	0.00659883	0.918355	0.412748	0.0809195	0.806124	0.0257893	0.633713	0.616308	0.0461473		14734	0.117771	-0.244144	0.105749	-0.453688	0.14401	-0.308428	-0.358913	0.0140133	0.111628	0.235256	-0.0335442	-0.297833	-0.0650762	0.0684257	0.267619
LUAD	tumour																LUAD	tumour
	MTCYB	MTND3	MTND5	MTCO3	MTATP6	MTRNR1	MTRNR2	MTCO1	MTATP8	MTND2	MTND1	MTCO2	MTND4L	MTND4	MTND6			MTCYB	MTND3	MTND5	MTCO3	MTATP6	MTRNR1	MTRNR2	MTCO1	MTATP8	MTND2	MTND1	MTCO2	MTND4L	MTND4	MTND6
585	0.203522	0.192781	0.655767	0.408254	0.760258	0.767037	0.974509	0.436843	0.920153	0.0183208	0.601584	0.683797	0.130638	0.0888247	0.601727		585	-0.175803	-0.179994	-0.0620545	-0.114851	0.0425003	-0.0412632	-0.00445254	-0.108027	0.0139673	0.320024	0.0726582	0.056707	0.208312	0.233812	-0.0726297
1610	0.814858	0.55948	0.974981	0.17033	0.158959	0.791202	0.621935	0.902227	0.274345	0.141778	0.869122	0.519903	0.119437	0.035325	0.723987		1610	0.0392839	-0.0977118	0.00526346	-0.227096	0.233127	-0.0444104	-0.0826157	-0.0206152	0.181918	0.242864	0.0276483	0.107682	0.256923	0.342454	0.0592139
4271	0.442353	0.633677	0.298131	0.245075	0.412413	0.271178	0.976967	0.692225	0.724586	0.384941	0.386008	0.262287	0.117177	0.409266	0.76017		4271	-0.157462	-0.0980575	0.212148	-0.236341	-0.167858	-0.224058	0.00595504	0.0815096	-0.072577	-0.177771	0.177379	-0.228152	0.314873	0.168974	-0.0629001
5520	0.123526	0.18506	0.550181	0.103274	0.669982	0.084557	0.226933	0.481787	0.772542	0.00294459	0.180406	0.917581	0.280416	0.00686922	0.437499		5520	-0.401193	0.349112	-0.161486	-0.422234	-0.115559	-0.444457	-0.320009	0.189635	0.0785207	0.692537	0.352602	-0.0281489	0.287415	0.645944	0.208895
7526	0.676509	0.491553	0.257074	0.27803	0.66856	0.175388	0.0170821	0.687559	0.494761	0.0106256	0.810176	0.394761	0.313781	0.82155	0.0239457		7526	0.0794302	0.130591	0.213594	-0.204639	-0.0814972	-0.254119	-0.432163	-0.0765716	0.129634	0.459543	0.0457762	-0.161203	-0.190309	0.0429875	0.411292
8303	0.0576481	0.162021	0.786115	0.0149368	0.0528574	0.0850158	0.46917	0.607651	0.314195	0.0240801	0.0133371	0.0196972	0.398395	0.659532	0.551474		8303	-0.314905	-0.23471	0.0461722	-0.397152	-0.320831	-0.287003	-0.122759	-0.0872404	-0.170089	0.370276	0.403229	-0.38184	-0.143027	-0.0748962	0.101128
9999	0.58103	0.755969	0.278262	0.62412	0.859612	0.0611976	0.514749	0.00217222	0.510008	0.363586	0.859045	0.210906	0.263514	0.74881	0.44591		9999	-0.0855082	-0.0482124	-0.167112	-0.075953	-0.0274491	-0.284551	-0.100864	-0.450103	0.101998	0.14033	-0.0275611	-0.192378	-0.172259	-0.0496736	-0.117906
10413	0.0184616	0.4721	0.139415	0.953201	0.0880739	0.974693	0.112599	0.502283	0.120127	0.175702	0.735006	0.577536	0.662391	0.686322	0.130501		10413	-0.328856	-0.102974	-0.209848	-0.0084267	-0.241277	-0.00455498	0.22489	-0.09611	-0.220415	0.192607	0.0485721	-0.0798487	-0.0626309	-0.0579393	-0.214585
12146	0.109559	0.285047	0.808166	0.589476	0.445515	0.377496	0.750965	0.931495	0.621942	0.518834	0.508363	0.395423	0.0801687	0.0215551	0.575531		12146	-0.236454	0.159227	0.0363829	-0.0807538	0.113988	-0.131713	0.0475469	0.0128856	0.0738154	0.0964819	-0.0988997	0.126874	0.257829	0.334502	0.0837857
12274	0.248159	0.926759	0.620798	0.631695	0.558715	0.454758	0.507894	0.92067	0.485609	0.369408	0.27655	0.622971	0.938327	0.587005	0.367699		12274	-0.164685	0.0131984	0.070946	0.0687461	0.0838152	-0.107024	-0.0948576	0.0142992	0.0998743	0.128348	0.155288	-0.070506	0.0111094	0.0778756	0.128803
14734	0.915336	0.757412	0.354395	0.755425	0.796261	0.646335	0.974702	0.315534	0.864692	0.821129	0.813762	0.440169	0.0691801	0.707294	0.018914		14734	0.0145333	0.0422096	0.126104	0.0425663	-0.035287	0.0626709	-0.00433548	0.136573	-0.0232936	0.0309028	-0.0321982	0.105237	-0.244652	0.0513014	0.3128
LUSC	normal																LUSC	normal
	MTCYB	MTND3	MTND5	MTCO3	MTATP6	MTRNR1	MTRNR2	MTCO1	MTATP8	MTND2	MTND1	MTCO2	MTND4L	MTND4	MTND6			MTCYB	MTND3	MTND5	MTCO3	MTATP6	MTRNR1	MTRNR2	MTCO1	MTATP8	MTND2	MTND1	MTCO2	MTND4L	MTND4	MTND6
585	0.598688	0.183826	0.0282828	0.881094	0.49678	0.995972	0.384272	0.544493	0.160867	0.745471	0.386799	0.410717	0.050445	0.727411	0.14317		585	-0.0754606	0.18911	-0.307274	-0.0214757	0.097345	0.000724917	-0.124442	0.0868542	-0.199307	0.0465856	-0.123787	-0.117708	-0.275423	-0.0500193	-0.20792
1610	0.815329	0.979176	0.017489	0.486019	0.924045	0.728762	0.760611	0.363337	0.0103326	0.391321	0.255877	0.546664	0.212677	0.393267	0.0129802		1610	-0.0342394	0.0038277	-0.33813	-0.101893	0.0139803	0.0508189	-0.0446565	0.132711	-0.363131	0.12521	0.165462	-0.0882188	-0.181234	-0.1247	-0.352527
4271	0.96851	0.281583	0.576422	0.165402	0.564284	0.565951	0.616243	0.87652	0.116085	0.655134	0.150746	0.856233	0.728724	0.87295	0.923124		4271	-0.00572776	-0.15528	0.0809176	-0.199236	-0.0834972	0.0831415	0.0726209	-0.0225417	-0.225063	0.0647358	0.206233	0.0262818	-0.0502892	-0.0231987	0.0140004
5520	0.939244	0.91144	0.0795625	0.452272	0.844638	0.206782	0.20545	0.464059	0.193539	0.809731	0.779522	0.193879	0.354068	0.674329	0.00742714		5520	0.0119761	0.0174749	-0.270328	-0.117692	0.0307844	-0.19643	-0.196996	0.114666	-0.202179	-0.0378189	0.0439656	-0.202027	0.144845	0.0659558	-0.402671
7526	0.950334	0.0674979	0.0157088	0.673998	0.229096	0.454439	0.43815	0.392571	0.732177	0.637077	0.0578268	0.62207	0.449312	0.2003	0.325538		7526	-0.00923371	0.266132	-0.346905	0.0623012	-0.176883	-0.110552	-0.114559	-0.126236	0.0507014	0.0698551	-0.275743	-0.0729752	-0.111805	-0.188156	-0.144974
8303	0.253604	0.227614	0.23502	0.00999687	0.350777	0.297101	0.0857671	0.302548	0.00792486	0.371621	0.073965	0.548264	0.153517	0.475509	0.0448984		8303	0.166245	-0.17555	-0.172828	-0.364638	0.136191	-0.152009	-0.248003	-0.150325	-0.375048	0.130455	0.257584	-0.0878683	-0.207016	0.10435	-0.28785
9999	0.409042	0.0571186	0.257035	0.00177369	0.792961	0.466672	0.402734	0.0534155	0.0167117	0.508247	0.0790965	0.268971	0.149796	0.955164	0.0426408		9999	0.119355	-0.270838	-0.163343	-0.43113	-0.038068	-0.105318	-0.120958	-0.274828	-0.336979	0.0957669	0.250688	-0.159361	-0.206703	0.00815743	-0.287872
10413	0.130696	0.141874	0.367318	0.00479529	0.586753	0.0597543	0.220656	0.339808	0.00294586	0.455546	0.0439964	0.205554	0.299288	0.322419	0.327863		10413	0.216671	-0.210716	0.130243	-0.39265	-0.0787413	-0.268124	-0.17631	-0.137833	-0.412059	0.10795	0.286092	-0.182128	-0.149748	0.14283	-0.141248
12146	0.794185	0.398155	0.192761	0.504954	0.587745	0.196978	0.41972	0.217524	0.138853	0.470359	0.263441	0.803475	0.627045	0.840091	0.445317		12146	0.0378378	0.122131	-0.187297	-0.0965083	0.0785332	-0.185567	-0.116674	-0.177493	-0.212289	-0.104454	0.161191	-0.0360945	-0.0704107	-0.0292697	-0.110401
12274	0.187374	0.988491	0.964915	0.544651	0.371167	0.797896	0.440117	0.413949	0.0717676	0.923215	0.36348	0.529581	0.549478	0.839677	0.45271		12274	0.189547	-0.00209295	-0.00638195	-0.0877257	-0.129208	0.0371409	-0.111659	0.118118	-0.256847	0.0139839	0.13128	-0.0910213	-0.0866795	-0.0293465	-0.108627
14734	0.552984	0.408823	0.256313	0.286811	0.547076	0.129004	0.346136	0.758276	0.41784	0.993668	0.974335	0.879744	0.165601	0.669287	0.748682		14734	-0.0850352	0.118182	-0.161915	0.15205	0.0862994	0.215404	0.134658	0.0441669	-0.115938	0.0011395	0.00461946	0.0217214	-0.197122	0.0612725	-0.045978
LUSC	tumour																LUSC	tumour
	MTCYB	MTND3	MTND5	MTCO3	MTATP6	MTRNR1	MTRNR2	MTCO1	MTATP8	MTND2	MTND1	MTCO2	MTND4L	MTND4	MTND6			MTCYB	MTND3	MTND5	MTCO3	MTATP6	MTRNR1	MTRNR2	MTCO1	MTATP8	MTND2	MTND1	MTCO2	MTND4L	MTND4	MTND6
585	0.201012	0.167825	0.910815	0.693167	0.304407	0.0199972	0.138726	0.903815	0.0190101	0.0623141	0.0973751	0.972779	0.267524	0.624405	0.50369		585	0.189925	0.204554	-0.0167893	-0.0590936	0.153044	0.338374	0.219227	-0.0181132	0.340962	-0.274048	-0.2447	-0.00511503	0.165065	-0.0732953	-0.0999866
1610	0.026645	0.715803	0.85967	0.51298	0.029341	0.336166	0.94202	0.843805	0.00422177	0.453681	0.199262	0.785527	0.186424	0.793574	0.607963		1610	0.359485	0.0610446	-0.0296645	-0.109463	0.353759	0.160363	-0.0122058	-0.0330578	0.453724	-0.125255	-0.212952	-0.0456461	0.219036	0.0438947	-0.0859332
4271	0.891734	0.716199	0.476903	0.814994	0.384612	0.57247	0.263677	0.737881	0.636901	0.404449	0.69211	0.794854	0.507802	0.488923	0.236585		4271	0.0235118	-0.0627451	-0.122422	0.0404083	0.149361	0.0972792	0.191315	-0.0577689	0.0814152	0.143288	-0.0683331	0.0448981	0.114041	0.11913	-0.202354
5520	0.500191	0.517325	0.0580479	0.49124	0.527461	0.350747	0.46482	0.272698	0.935068	0.890964	0.743783	0.564757	0.827807	0.682324	0.21115		5520	0.227969	-0.219163	-0.586205	-0.232621	0.214011	0.311712	0.246578	-0.362889	-0.0279145	-0.046953	0.111658	-0.195402	-0.0744387	0.139573	-0.409413
7526	0.676284	0.681309	0.086961	0.12769	0.078097	0.352143	0.921051	0.741676	0.852412	0.0585122	0.287724	0.225675	0.739366	0.12851	0.0359599		7526	0.0841965	-0.0828178	-0.335656	0.30055	0.344894	0.186304	0.0200192	0.0665153	0.0375688	0.368588	-0.212301	0.241118	-0.0671312	0.299935	-0.405312
8303	0.937415	0.246103	0.329061	0.294138	0.04384	0.46367	0.769613	0.912656	0.341455	0.142021	0.312697	0.531706	0.660272	0.907155	0.461994		8303	0.0117698	-0.172558	-0.145524	0.156291	0.295366	-0.109519	0.0438823	-0.0164414	0.141877	0.217458	0.150474	-0.0935429	-0.0658158	0.0174814	-0.109928
9999	0.977854	0.350166	0.457106	0.453259	0.336143	0.874514	0.476608	0.268007	0.05178	0.795021	0.735413	0.108212	0.708937	0.963335	0.229564		9999	-0.00402754	-0.134933	0.107579	-0.108495	0.138873	0.0229108	0.102996	0.159678	0.276661	-0.0376807	-0.0490018	-0.229923	-0.0541205	-0.0066696	0.173006
10413	0.356519	0.407817	0.881214	0.316986	0.482823	0.0589616	0.119448	0.256656	0.181554	0.720166	0.801625	0.130578	0.262033	0.728719	0.910368		10413	-0.13318	0.119665	-0.0216785	-0.144425	-0.101557	0.26893	0.223063	-0.163471	0.19203	0.0519419	0.0364412	-0.216736	0.161661	-0.0502901	-0.0163325
12146	0.138701	0.604552	0.887616	0.92062	0.00899194	0.534724	0.821015	0.985508	0.185424	0.0685194	0.714091	0.107218	0.137135	0.0127046	0.614549		12146	0.21237	-0.0750317	0.0205024	0.0144581	0.365795	0.0898914	0.0328166	0.0026354	0.190373	0.259738	0.053119	0.230555	0.213196	0.35004	-0.072969
12274	0.140906	0.64	0.366258	0.335944	0.800003	0.23227	0.30254	0.941031	0.200725	0.946766	0.685634	0.147203	0.946955	0.888877	0.474284		12274	-0.209078	-0.0670801	-0.129187	-0.137504	-0.036365	-0.170264	0.14723	-0.0106214	0.182177	-0.00958692	0.0580735	-0.205891	-0.00955278	-0.0200608	-0.10247
14734	0.0689333	0.867663	0.944016	0.704284	0.364291	0.576749	0.73662	0.841445	0.924972	0.083225	0.046864	0.666139	0.2254	0.180873	0.701871		14734	0.256768	-0.0239223	0.010083	0.0544574	0.129714	-0.0800133	-0.0482652	-0.0287182	-0.0135214	-0.244929	-0.279662	-0.0618918	-0.172758	-0.190368	0.0549232
PRAD	normal																PRAD	normal
	MTCYB	MTND3	MTND5	MTCO3	MTATP6	MTRNR1	MTRNR2	MTCO1	MTATP8	MTND2	MTND1	MTCO2	MTND4L	MTND4	MTND6			MTCYB	MTND3	MTND5	MTCO3	MTATP6	MTRNR1	MTRNR2	MTCO1	MTATP8	MTND2	MTND1	MTCO2	MTND4L	MTND4	MTND6
585	0.269569	0.899685	0.0525362	0.988455	0.648751	0.134994	0.554857	0.344327	0.559986	0.565824	0.807584	0.719373	0.990871	0.265124	0.278654		585	0.159165	-0.0182886	-0.275808	-0.00209944	0.0660166	0.214338	0.0855189	-0.136561	-0.084417	-0.0831686	-0.0353251	-0.0520954	0.00166002	0.160631	-0.156217
1610	0.463147	0.524994	0.0708289	0.745175	0.661833	0.16324	0.0359405	0.876016	0.2322	0.499359	0.49655	0.497018	0.741292	0.353056	0.0517506		1610	-0.108442	-0.0940254	-0.263076	-0.0481529	-0.0647718	0.2045	0.303579	-0.0231264	-0.175728	0.0998887	-0.10054	0.100432	-0.0489129	0.137021	-0.282465
4271	0.651602	0.0322781	0.258322	0.457609	0.11304	0.750445	0.92058	0.0215671	0.299051	0.0181492	0.00178144	0.45873	0.149499	0.682062	0.586667		4271	0.0778908	-0.357553	0.193435	0.1278	-0.268712	-0.0549065	-0.0172238	0.381821	-0.177973	0.391704	0.502678	-0.127484	0.245186	-0.0706842	-0.0937197
5520	0.178701	0.613852	0.633227	0.162419	0.65961	0.948421	0.134903	0.367173	0.830492	0.57196	0.466036	0.447653	0.932581	0.433626	0.565799		5520	0.272104	0.103793	-0.0981868	-0.282244	-0.0906603	0.0133425	-0.301157	-0.1844	-0.0441327	-0.116176	-0.149504	-0.155662	0.0174478	-0.160452	-0.118029
7526	0.413826	0.282218	0.0873535	0.828554	0.903063	0.0319677	0.11462	0.156363	0.156208	0.911697	0.0744777	0.945043	0.655001	0.337375	0.0948723		7526	0.129469	-0.169847	-0.26703	-0.034445	0.0193761	0.331534	0.247119	-0.222674	-0.222755	0.017643	-0.27816	-0.0109672	-0.0710023	0.151753	-0.261111
8303	0.832656	0.199273	0.138744	0.577091	0.883189	0.747105	0.281099	0.343929	0.048902	0.633064	0.649797	0.125599	0.70883	0.855007	0.112774		8303	0.0320274	-0.192784	-0.22166	-0.084395	-0.0222736	0.0488602	0.162331	0.142756	-0.292051	-0.0722888	0.0687581	-0.229125	-0.0565718	-0.0276998	-0.236998
9999	0.0890914	0.174143	0.0352648	0.928391	0.638614	0.572735	0.196127	0.514069	0.95857	0.347899	0.6278	0.650656	0.557272	0.0261101	0.0572131		9999	0.242974	-0.195276	-0.298461	0.0130387	0.0680611	0.0816985	0.185914	-0.0944621	0.00753717	0.135563	0.0702569	-0.0656338	0.0849994	0.314525	-0.270739
10413	0.201775	0.150893	8.46381e-05	0.779465	0.824875	0.720285	0.509769	0.0557413	0.0194913	0.785409	0.258114	0.922061	0.0420895	0.128258	0.000274317		10413	0.183631	-0.20616	-0.526887	0.0406112	0.0320975	0.0519188	0.0954249	-0.272297	-0.329412	-0.0394895	-0.162978	0.0141947	-0.288609	0.21802	-0.49312
12146	0.0619362	0.148111	0.0628402	0.192111	0.173486	0.20522	0.267639	0.247583	0.221793	0.729653	0.232213	0.116512	0.275333	0.107606	0.465307		12146	0.265949	-0.207544	-0.265066	0.187566	0.195569	0.18226	0.1598	-0.166585	0.175883	0.0501101	0.172041	0.224807	-0.157287	0.230308	-0.105639
12274	0.361088	0.591319	0.595493	0.479408	0.312567	0.0872743	0.185072	0.593617	0.704696	0.0909809	0.770903	0.19504	0.621479	0.255263	0.572094		12274	0.131931	-0.077785	-0.0769136	-0.102347	-0.145736	0.244324	0.190523	-0.0773049	-0.0549463	-0.241592	-0.0422308	-0.186359	-0.0715475	-0.163944	-0.0818345
14734	0.131297	0.139109	0.00237252	0.300682	0.683407	0.451152	0.155163	0.363589	0.318148	0.996429	0.118331	0.597426	0.0336641	0.953511	0.019777		14734	0.216341	-0.212155	0.420329	-0.149321	-0.059119	-0.108999	-0.204073	0.131251	0.144083	-0.000649351	0.223723	-0.0765109	0.300997	-0.00845849	0.328688
PRAD	tumour																PRAD	tumour
	MTCYB	MTND3	MTND5	MTCO3	MTATP6	MTRNR1	MTRNR2	MTCO1	MTATP8	MTND2	MTND1	MTCO2	MTND4L	MTND4	MTND6			MTCYB	MTND3	MTND5	MTCO3	MTATP6	MTRNR1	MTRNR2	MTCO1	MTATP8	MTND2	MTND1	MTCO2	MTND4L	MTND4	MTND6
585	0.26169	0.251709	0.391026	0.321757	0.331964	0.955479	0.283687	0.104991	0.358956	0.424867	0.339478	0.477271	0.735509	0.709461	0.227418		585	-0.163483	-0.166901	-0.125287	-0.144537	-0.14155	-0.00818655	0.156244	-0.234401	0.133916	-0.116622	-0.139387	-0.103936	-0.0495065	0.0545954	-0.175624
1610	0.224744	0.988333	0.881369	0.187342	0.09879	0.549762	0.622802	0.859015	0.153846	0.475892	0.0595527	0.186305	0.189726	0.282177	0.674706		1610	-0.184608	-0.00224289	-0.0228877	-0.200185	-0.249192	-0.0915508	0.0753413	0.027241	-0.216147	-0.109027	-0.283055	-0.200647	-0.199129	-0.163842	-0.0643098
4271	0.920748	0.562957	0.607762	0.223833	0.842358	0.447547	0.0785595	0.597762	0.715523	0.562991	0.420532	0.435686	0.210992	0.0811388	0.237649		4271	-0.0154426	-0.0896093	-0.0795457	0.187141	0.0308634	-0.117486	-0.268035	0.0817624	0.056526	0.0896015	0.124545	0.120555	0.192342	0.265834	-0.18177
5520	0.0923675	0.666117	0.102034	0.503025	0.158553	0.63148	0.715615	0.336062	0.316476	0.963947	0.912005	0.943265	0.252871	0.125324	0.112784		5520	-0.297773	0.0780047	-0.289659	0.120817	-0.251172	0.0866801	-0.0658925	-0.172858	0.179886	-0.00818398	-0.0200068	-0.0128849	-0.204819	-0.272256	-0.281292
7526	0.925357	0.879135	0.748105	0.906277	0.68715	0.278396	0.712281	0.527933	0.649024	0.766919	0.356694	0.911147	0.161122	0.703842	0.214034		7526	-0.0149055	0.0241909	-0.0510613	0.0187306	0.0640099	-0.171182	-0.0586265	-0.100168	0.0723166	0.0471336	0.145858	-0.0177534	0.220207	0.0604267	-0.195776
8303	0.00521076	0.0382683	0.89287	0.704265	0.270222	0.353163	0.0244581	0.528167	0.273162	0.390118	0.63629	0.737409	0.937041	0.651918	0.823186		8303	-0.393047	-0.296948	0.0197469	0.0556179	-0.160629	-0.135524	0.321133	0.0923053	-0.159659	-0.125526	-0.0692628	-0.0491377	-0.0115828	-0.0660782	0.0327584
9999	0.132392	0.110446	0.294045	0.00165672	0.00265249	0.869503	0.604055	0.0359983	0.0441969	0.507703	0.22329	2.52014e-05	0.00169347	0.0147306	0.238145		9999	-0.215744	-0.228518	-0.151363	-0.433613	-0.416093	-0.0238336	0.0751345	-0.29733	-0.285833	-0.0958891	0.175323	-0.558298	-0.432816	-0.343056	-0.169907
10413	0.734859	0.029763	0.276002	0.435632	0.228795	0.0634961	0.865154	0.574367	0.362428	0.845959	0.0241298	0.351027	0.828494	0.742254	0.447552		10413	0.0491082	-0.307626	0.157071	-0.11275	-0.173288	-0.264431	-0.0246352	0.0813524	-0.131566	0.0281823	0.31861	-0.134694	0.0314238	0.047689	0.109863
12146	0.342078	0.303702	0.965676	0.79278	0.485117	0.176658	0.526235	0.925275	0.636339	0.627663	0.462667	0.871423	0.7142	0.43598	0.945459		12146	-0.140146	-0.151591	0.00637922	-0.0389296	-0.103212	-0.198301	0.0937452	-0.0139034	-0.0700078	-0.0718089	-0.108558	-0.0239902	0.0542506	0.115099	0.0101413
12274	0.0574018	0.529431	0.787185	0.286513	0.813713	0.648005	0.133477	0.297152	0.758403	0.540106	0.678598	0.154442	0.0582112	0.21556	0.970363		12274	-0.270542	-0.0910543	-0.0391549	-0.153717	-0.0341791	0.0661665	0.215155	-0.150404	0.0446046	-0.0887149	-0.060068	-0.204423	-0.269701	-0.178241	0.00539047
14734	0.987567	0.947412	0.350719	0.397958	0.968013	0.299178	0.329342	0.660249	0.923695	0.835534	0.48571	0.0355778	0.704133	0.264204	0.63825		14734	-0.00226103	-0.00956962	0.134779	-0.122181	0.00581815	-0.149781	-0.140821	-0.0637127	0.0138963	-0.0301154	0.100891	-0.297976	0.0550561	-0.160937	0.0681349
STAD	normal																STAD	normal
	MTCYB	MTND3	MTND5	MTCO3	MTATP6	MTRNR1	MTRNR2	MTCO1	MTATP8	MTND2	MTND1	MTCO2	MTND4L	MTND4	MTND6			MTCYB	MTND3	MTND5	MTCO3	MTATP6	MTRNR1	MTRNR2	MTCO1	MTATP8	MTND2	MTND1	MTCO2	MTND4L	MTND4	MTND6
585	0.00584872	0.15757	0.119253	0.437953	0.117891	0.0425526	0.381113	0.879102	0.728555	0.716539	0.651041	0.0306782	0.894998	0.0537501	0.433937		585	0.483593	-0.26013	0.285682	-0.144517	-0.286696	-0.366528	-0.162948	0.0284845	0.0649344	0.0679286	0.084568	-0.388729	-0.024717	0.349772	0.145773
1610	0.0131706	0.850525	0.628137	0.0416774	0.00875606	0.15397	0.186696	0.874235	0.0794445	0.443473	0.799376	4.05109e-05	0.538079	0.199006	0.363522		1610	0.440343	-0.0352858	0.0905333	-0.367981	-0.462771	-0.262325	-0.243573	-0.0296401	-0.319823	0.142799	-0.0475769	-0.667809	-0.114943	0.237121	-0.168969
4271	0.0212427	0.411116	0.682836	0.678872	0.941865	0.143416	0.375843	0.317213	0.141513	0.644026	0.287944	0.341845	0.197586	0.0416774	0.299869		4271	0.412103	-0.15304	0.076419	0.0774272	0.0136585	-0.268979	-0.164734	0.185704	-0.270216	0.0863861	0.197075	-0.176631	-0.23785	0.367981	-0.192358
5520	0.323273	0.373761	0.178271	0.344929	0.194421	0.701082	0.659159	0.373761	0.202727	0.319979	0.582062	0.716092	0.079287	0.209763	0.329313		5520	0.201632	0.181921	-0.272363	0.192967	-0.262908	-0.079051	0.0907878	-0.181921	-0.258254	-0.20298	0.113155	-0.0749086	-0.350379	-0.254413	-0.199181
7526	0.0825972	0.00991749	0.239929	0.877529	0.380828	0.584899	0.861344	0.0357111	0.0346249	0.668251	0.215025	0.140341	0.212571	0.502153	0.0884745		7526	0.361523	-0.51559	0.249379	0.033221	-0.187297	-0.117381	-0.0376505	0.430544	-0.432853	0.0922131	0.262635	-0.310063	-0.263996	0.143958	-0.355243
8303	0.395942	0.0770088	0.965941	0.0233998	0.191758	0.00441129	0.0937279	0.020944	0.143284	0.0101602	0.124889	0.400566	0.0989765	0.421753	0.194595		8303	0.18087	-0.368696	-0.00956522	0.464348	0.275985	0.567826	0.350435	0.472174	-0.307893	-0.514162	0.322022	0.17913	-0.345217	-0.171304	-0.273913
9999	0.0110057	0.300513	0.534795	0.131484	0.282203	0.767427	0.723838	0.754635	0.31624	0.696687	0.130629	0.783963	0.561311	0.993318	0.422161		9999	0.457588	-0.1955	0.117939	0.281731	-0.202908	-0.0563461	0.067296	0.0595398	-0.189362	-0.0742222	0.282331	-0.0522399	-0.110423	-0.00159685	-0.152157
10413	0.497147	0.0858201	0.733834	0.704052	0.941147	0.303544	0.198582	0.212554	0.0363056	0.0317665	0.430178	0.543289	0.12792	0.165712	0.796314		10413	0.128924	-0.318941	0.0647674	0.0723348	-0.0140767	0.194302	0.241487	0.234365	-0.383751	-0.392825	0.149573	-0.115513	-0.284251	-0.259737	-0.0491876
12146	0.014335	0.0093398	0.00388518	0.154956	0.000111713	0.0116529	0.00421166	0.951928	0.339003	1.60998e-05	0.575153	0.0117802	0.418592	0.00136724	0.213101		12146	-0.435502	0.459321	-0.503478	0.26172	0.638308	0.447223	0.499647	-0.0112915	-0.177657	-0.692098	-0.10469	0.446618	-0.150635	-0.549451	0.230064
12274	0.736358	0.275877	0.420754	0.903809	0.431042	0.533205	0.661792	0.767427	0.906644	0.273701	0.780921	0.165554	0.600149	0.806152	0.938012		12274	-0.0641308	0.205538	-0.152614	0.0230403	0.149296	0.118395	0.0832645	-0.0563461	0.0223584	-0.206452	-0.0529935	0.259831	0.0997004	-0.046765	0.0148279
14734	0.25182	0.235647	0.396596	0.000465642	0.00344873	0.0420809	0.022033	0.438156	0.633527	0.0019647	0.523253	0.00137702	0.955358	0.131246	0.161943		14734	-0.212182	0.218952	-0.157258	0.6	0.509057	0.368548	0.412097	0.143952	-0.0891219	-0.534208	-0.119135	0.556452	0.0104849	-0.277016	0.257258
STAD	tumour																STAD	tumour
	MTCYB	MTND3	MTND5	MTCO3	MTATP6	MTRNR1	MTRNR2	MTCO1	MTATP8	MTND2	MTND1	MTCO2	MTND4L	MTND4	MTND6			MTCYB	MTND3	MTND5	MTCO3	MTATP6	MTRNR1	MTRNR2	MTCO1	MTATP8	MTND2	MTND1	MTCO2	MTND4L	MTND4	MTND6
585	0.734231	0.683573	0.107382	0.495067	0.765126	0.000949936	0.0418012	0.00988154	0.954307	0.0114274	0.772051	0.142153	0.156709	0.323422	0.0011356		585	0.0646673	0.0776008	-0.299889	-0.129543	-0.0569197	-0.572354	-0.373914	-0.463546	0.0109253	0.455485	-0.0551955	-0.274471	-0.265179	0.186622	-0.565219
1610	0.820615	0.581167	0.123025	0.818538	0.597297	0.151318	0.162968	0.718847	0.136036	0.0913511	0.380771	0.171672	0.316703	0.304489	0.00153484		1610	0.0424523	-0.103055	-0.28292	-0.0429522	0.0987081	-0.263964	-0.256907	-0.0673523	0.273846	0.308461	-0.163064	0.251865	0.185896	0.190563	-0.544666
4271	0.150182	0.646803	0.537335	0.398445	0.0360489	0.295836	0.349936	0.256609	0.152824	0.731064	0.110042	0.62363	0.931096	0.594739	0.431094		4271	-0.264674	-0.0856654	-0.115152	0.157172	-0.377958	-0.19394	0.173738	-0.210101	-0.263031	0.0643112	0.292713	-0.0917174	0.0161943	-0.0993941	-0.146667
5520	0.855581	0.509623	0.409766	0.265024	0.106648	0.151289	0.72131	0.00868312	0.319557	0.26966	0.766981	0.908265	0.58927	0.946817	0.173534		5520	-0.0367536	0.132619	-0.165366	-0.222325	-0.317436	-0.283878	-0.0719648	-0.494873	0.199052	0.220235	-0.0598069	-0.0232737	0.108739	0.0134743	-0.269792
7526	0.840734	0.226086	0.0948709	0.161683	0.537145	0.0503753	0.33447	0.884208	0.606375	0.211649	0.198283	0.0456605	0.359302	0.229549	0.0292897		7526	-0.0414312	-0.245825	-0.3345	0.28272	0.126775	-0.387661	-0.19711	0.0300325	0.105977	0.253398	-0.260728	0.395255	0.187395	0.244057	-0.427704
8303	0.0281426	0.526698	0.076843	0.508692	0.415491	0.891264	0.0637317	0.559433	0.135545	0.594252	0.216269	0.281279	0.104689	0.378314	0.34071		8303	-0.49041	-0.150432	-0.406015	0.156391	-0.192771	0.0330827	0.42406	-0.138346	-0.345865	-0.126793	0.289157	0.252632	0.373588	-0.207519	-0.22406
9999	0.45713	0.893578	0.177688	0.541655	0.887506	0.573829	0.679875	0.994837	0.851088	0.584632	0.991377	0.185074	0.495561	0.962148	0.240129		9999	-0.1386	-0.0250531	-0.248485	0.11394	0.0264914	-0.105051	-0.0771719	-0.00121212	-0.0351516	0.102117	-0.00202429	0.244445	0.127126	0.00888891	-0.217374
10413	0.210938	0.614674	0.779672	0.496457	0.160136	0.606242	0.135645	0.871172	0.245642	0.555931	0.0902255	0.162664	0.580063	0.694793	0.618853		10413	-0.239438	0.097549	-0.0541872	0.131034	-0.267818	0.0995074	0.283744	0.0315271	-0.222167	-0.114013	0.320346	0.26601	0.107161	-0.0758621	0.0960591
12146	0.125307	0.186696	0.0666063	0.0457737	0.532018	0.373744	0.00348809	0.957669	0.0113633	0.179846	0.0924448	0.0175734	0.929519	0.18093	0.432994		12146	-0.281278	0.243573	-0.334274	0.3625	-0.11665	0.164919	0.514113	-0.0100807	-0.452016	-0.247293	0.307475	0.42621	0.0165657	-0.246371	0.145565
12274	0.380382	0.268498	0.435814	0.066962	0.27733	0.329978	0.471845	0.411513	0.934288	0.340406	0.716736	0.137182	0.602597	0.467441	0.302513		12274	0.166094	0.208656	-0.147772	0.338888	-0.204931	-0.184154	-0.136543	-0.155632	-0.0157204	0.180288	0.0690993	0.277803	-0.0990348	0.137891	-0.194709
14734	0.51609	0.307152	0.0044967	0.227824	0.034239	0.109582	0.492984	0.00685929	0.829279	0.0531187	0.145753	0.8259	0.563499	0.990493	0.0470612		14734	-0.121182	0.189535	-0.501613	0.222581	0.381433	-0.293145	-0.127419	-0.479839	-0.0403226	0.35064	-0.267475	-0.041129	-0.107879	-0.00241936	-0.360484
THCA	normal																THCA	normal
	MTCYB	MTND3	MTND5	MTCO3	MTATP6	MTRNR1	MTRNR2	MTCO1	MTATP8	MTND2	MTND1	MTCO2	MTND4L	MTND4	MTND6			MTCYB	MTND3	MTND5	MTCO3	MTATP6	MTRNR1	MTRNR2	MTCO1	MTATP8	MTND2	MTND1	MTCO2	MTND4L	MTND4	MTND6
585	0.175424	0.187127	0.115338	0.448124	0.440427	0.68953	0.141188	0.135457	0.887629	0.117973	0.302128	0.497686	0.622429	0.727035	0.486685		585	0.182001	0.177262	-0.210886	0.102477	0.104214	0.0540733	-0.197339	-0.20017	0.0191387	0.209405	0.139092	0.0916625	-0.0666249	0.0472568	-0.0940116
1610	0.615963	0.283066	0.207169	0.873386	0.178385	0.645402	0.0341647	0.379948	0.557937	0.00625023	0.0997969	0.666583	0.384843	0.0560947	0.308131		1610	0.0704924	0.150194	-0.176106	0.0224216	0.18768	-0.0646839	-0.291545	-0.123077	0.0823067	0.370936	0.22852	-0.0605706	0.121827	0.264019	-0.142676
4271	0.292105	0.202508	0.282501	0.776466	0.190492	0.419178	0.999508	0.534614	0.216376	0.188581	0.668951	0.361698	0.312868	0.292399	0.172288		4271	0.143286	-0.172918	0.146139	0.0388023	0.17755	0.110108	8.42256e-05	0.0847436	0.167807	-0.178306	0.0584074	0.124218	0.13732	0.143199	0.184985
5520	0.428787	0.191937	0.042835	0.719497	0.343326	0.344163	0.706372	0.0450589	0.66864	0.0452988	0.298742	0.157833	0.935256	0.542197	0.209493		5520	-0.118196	0.193743	-0.296723	0.0537953	0.141334	0.141092	0.0564278	-0.293754	0.064094	0.293441	0.154826	0.209366	-0.0121767	0.0911734	-0.186466
7526	0.296328	0.248292	0.0979873	0.659019	0.618335	0.314952	0.7084	0.535281	0.359388	0.822068	0.767226	0.267521	0.283751	0.664596	0.111706		7526	-0.147617	0.16299	-0.231961	0.0626557	-0.0707221	0.142098	0.0531199	-0.0879448	0.129715	-0.0319548	0.0420527	0.156617	0.151473	0.0615657	-0.223206
8303	0.558615	0.295868	0.91071	0.686076	0.718911	0.986206	0.84111	0.276437	0.93493	0.483059	0.840566	0.307226	0.826433	0.262774	0.627803		8303	-0.0791028	-0.140887	0.0151893	-0.0547076	0.0487229	-0.00234182	-0.02715	0.146624	-0.0110586	-0.094792	-0.0272442	0.137647	0.0296956	0.15082	-0.0656003
9999	0.342289	0.102743	0.614014	0.478258	0.511478	0.983331	0.904804	0.654241	0.254678	0.782411	0.104796	0.551664	0.117652	0.142361	0.389412		9999	0.128103	-0.218344	0.0682368	-0.0958302	-0.088755	-0.0028301	0.0161985	-0.0606112	0.153375	-0.0373965	0.217082	-0.0805005	0.209584	0.19677	-0.116188
10413	0.63954	0.697665	0.603168	0.909413	0.949068	0.936982	0.863639	0.129552	0.535677	0.969318	0.87791	0.533922	0.680146	0.452883	0.805786		10413	0.0633751	-0.0525841	-0.0703286	0.0154109	0.00865231	-0.0107093	-0.0232603	-0.203182	0.0837478	0.00520999	0.020806	-0.084107	0.0557992	0.101412	0.0332944
12146	0.109054	0.457259	0.18448	0.209228	0.823741	0.684883	0.155125	0.0996752	0.21634	0.75973	0.126975	0.616105	0.00825704	0.167297	0.697589		12146	0.214525	-0.100437	0.178315	-0.168864	-0.0301637	0.0549269	0.190796	0.220267	0.166296	0.0414089	0.20453	-0.0678354	0.346619	0.185428	0.052598
12274	0.0109307	0.0132425	0.265433	0.259477	0.926332	0.0229083	0.212855	0.635432	0.82881	0.615198	0.0675411	0.077908	0.159973	0.374458	0.302998		12274	0.334713	-0.326304	0.149992	-0.151854	-0.0125237	-0.30097	-0.167546	0.0641519	0.0292828	0.0680095	0.243865	-0.23543	0.188622	0.11987	-0.138844
14734	0.370513	0.710359	0.703974	0.626974	0.397185	0.181818	0.015856	0.7303	0.584387	0.194546	0.823163	0.996946	0.209973	0.898516	0.43985		14734	0.120856	0.0502723	-0.0514333	-0.0657581	-0.114307	0.179385	0.318202	0.0466691	0.0739901	-0.174368	0.0302642	0.000518546	0.168592	-0.0172741	-0.104345
THCA	tumour																THCA	tumour
	MTCYB	MTND3	MTND5	MTCO3	MTATP6	MTRNR1	MTRNR2	MTCO1	MTATP8	MTND2	MTND1	MTCO2	MTND4L	MTND4	MTND6			MTCYB	MTND3	MTND5	MTCO3	MTATP6	MTRNR1	MTRNR2	MTCO1	MTATP8	MTND2	MTND1	MTCO2	MTND4L	MTND4	MTND6
585	0.435997	0.634643	0.457232	0.693486	0.824409	0.676091	0.907075	0.73802	0.432274	0.48183	0.630418	0.550759	0.539103	0.691208	0.722911		585	-0.105221	0.0643014	-0.100443	0.0533483	0.0300475	-0.0565478	-0.0158104	-0.0452829	0.106072	0.0950573	-0.065103	0.0806832	-0.0830481	0.0537656	-0.0480004
1610	0.171342	0.491044	0.0347235	0.227505	0.514959	0.675668	0.97656	0.556248	0.494653	0.0985999	0.715037	0.670548	0.375537	0.740289	0.0976305		1610	-0.229746	0.116835	-0.348146	0.203296	0.11051	-0.0711359	-0.0050021	0.0999233	0.11587	0.275706	0.0620952	0.0723254	-0.150004	0.0563853	-0.276471
4271	0.903911	0.938472	0.502124	0.175095	0.956592	0.379524	0.171889	0.196813	0.892931	0.260754	0.744589	0.0822838	0.498458	0.757493	0.898633		4271	0.0183017	-0.0117028	-0.101493	-0.203434	-0.00825243	-0.132645	-0.204924	-0.193825	-0.0204046	0.169273	0.0493632	-0.25893	-0.10236	0.046789	0.0193121
5520	0.599756	0.0805573	0.166577	0.328267	0.795609	0.639748	0.43372	0.229629	0.355759	0.025706	0.786814	0.529447	0.17494	0.060081	0.059427		5520	-0.0776742	0.25476	-0.202925	0.144167	0.0383864	-0.0693028	-0.115662	0.176684	0.136261	0.321827	0.0400768	0.0930217	0.199075	0.273394	-0.274068
7526	0.0857615	0.404373	0.225462	0.0139173	0.253376	0.693203	0.604161	0.696981	0.362606	0.00868099	0.163712	0.337066	0.874468	0.0374845	0.156039		7526	0.250631	0.123141	-0.17825	0.352786	0.168115	0.0584346	0.0767407	0.0576785	0.134351	0.374759	0.204276	0.141594	0.0234174	0.301213	-0.207981
8303	0.989576	0.361013	0.935793	0.578862	0.896041	0.978962	0.954246	0.945714	0.877856	0.354443	0.876723	0.250044	0.614242	0.799903	0.341401		8303	0.00176967	-0.123256	-0.0109116	-0.0750773	0.0176977	0.00357201	-0.0077716	0.00922289	-0.0208154	0.124939	0.0210099	-0.154863	0.068193	-0.0343238	-0.128337
9999	0.613781	0.482592	0.431706	0.36716	0.837353	0.996696	0.967283	0.65359	0.775944	0.747716	0.693432	0.0996504	0.638703	0.530719	0.73316		9999	-0.0682817	-0.0948929	0.106203	-0.121699	-0.0278008	0.000560823	0.00555571	-0.060733	0.0385371	0.0435485	-0.0533583	-0.220283	0.0635332	0.0847643	0.0461552
10413	0.429586	0.68135	0.042687	0.171928	0.685876	0.204312	0.0415513	0.425666	0.981813	0.000382171	0.447969	0.90427	0.876802	0.201096	0.0160895		10413	-0.106689	0.0555775	-0.269433	0.18346	-0.0547444	0.170676	0.27087	0.107593	-0.00308777	0.454562	0.102512	0.0162898	-0.0209965	0.171877	-0.317536
12146	0.0511308	0.594668	0.00805794	0.13211	0.242593	0.15354	0.718185	0.647041	0.79086	0.00949397	0.549195	0.0173628	0.794928	0.151491	0.0130838		12146	0.259637	0.0719793	-0.347634	0.201865	0.157295	0.191517	-0.0488542	-0.0619617	-0.0359101	0.340749	-0.0809991	0.314038	-0.0351959	0.192458	-0.326839
12274	0.496057	0.130183	0.907129	0.521023	0.506965	0.808405	0.428488	0.263123	0.358367	0.522822	0.939754	0.281905	0.470386	0.522328	0.834906		12274	-0.0920088	0.202856	-0.0158013	0.0867661	-0.0897021	0.0328367	0.106942	-0.150711	0.123931	-0.0863934	-0.0102373	-0.144984	0.0975442	-0.0864957	-0.0282248
14734	0.358997	0.882309	0.108644	0.484972	0.0431318	0.648725	0.10194	0.362121	0.440623	0.946479	0.39273	0.598475	0.00060365	0.07298	0.76218		14734	-0.12377	-0.0200511	0.214767	0.09438	-0.268879	0.0616452	0.218843	0.122974	0.10417	0.0090927	0.115382	0.0712387	0.440591	0.239321	0.0409738
